# Supplementary material
Source: PubMed Central journal article supplement (PMC5959003)
Supplement: NIHMS77747-supplement-Supplement.pdf [file NIHMS77747-supplement-Supplement.pdf]

## Supplementary Materials for

### **Membrane protein insertion through a mitochondrial $\beta$ -barrel gate**

Alexandra I.C. Höhr, Caroline Lindau, Christophe Wirth, Jian Qiu, David A. Stroud, Stephan Kutik, Bernard Guiard, Carola Hunte, Thomas Becker, Nikolaus Pfanner,<sup>‡</sup> Nils Wiedemann<sup>‡</sup>

<sup>‡</sup>Corresponding author. E-mail: nikolaus.pfanner@biochemie.uni-freiburg.de (N.P.);  
nils.wiedemann@biochemie.uni-freiburg.de (N.W.)

#### **This PDF file includes:**

Figs. S1 to S9  
Tables S1 to S4  
Caption for Model S1  
References

#### **Other supplementary material for this manuscript includes the following:**

Model S1

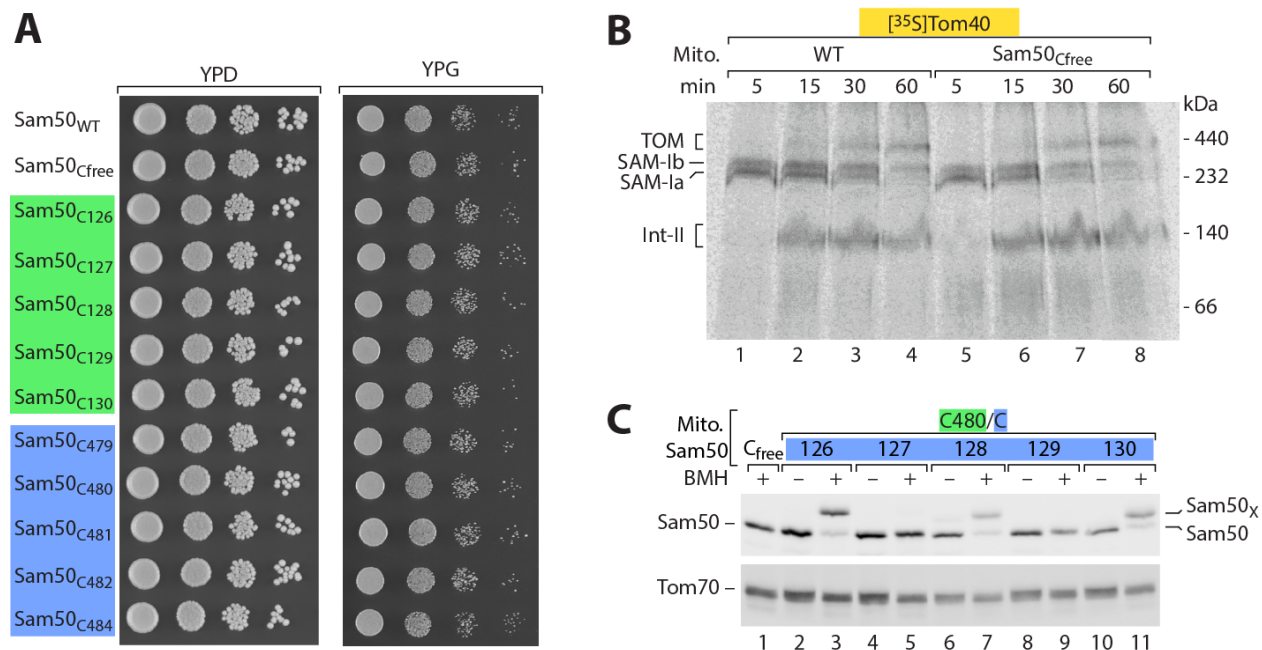

**Fig. S1. Characterization of yeast cells expressing Sam50 variants.** (A) Growth analysis of yeast cells on agar medium containing the fermentable carbon source glucose (YPD) or non-fermentable glycerol (YPG) at 30°C. Cells expressing cysteine-free Sam50 (Sam50<sub>Cfree</sub>) or Sam50 cysteine variants showed a growth behavior comparable to wild-type (WT) cells. (B) The import of radiolabeled Tom40 precursor into isolated mitochondria was analyzed by blue native PAGE and autoradiography. The biogenesis steps of [<sup>35</sup>S]Tom40, including formation of SAM intermediates Ia and Ib, intermediate II (Int-II, dimeric Tom40) and formation of the mature TOM complex, were comparable between WT and Sam50<sub>Cfree</sub> mitochondria. (C) Mitochondria from yeast strains expressing the indicated Sam50 variants were treated with bismaleimido-hexane (BMH) and analyzed by SDS-PAGE, Western blotting and immunodecoration with antibodies against Sam50 and Tom70. The lateral Sam50 gate was efficiently crosslinked (Sam50<sub>x</sub>) with cysteine residues of  $\beta$  strand 1 and  $\beta$  strand 16 pointing into the inside of the Sam50  $\beta$ -barrel channel.

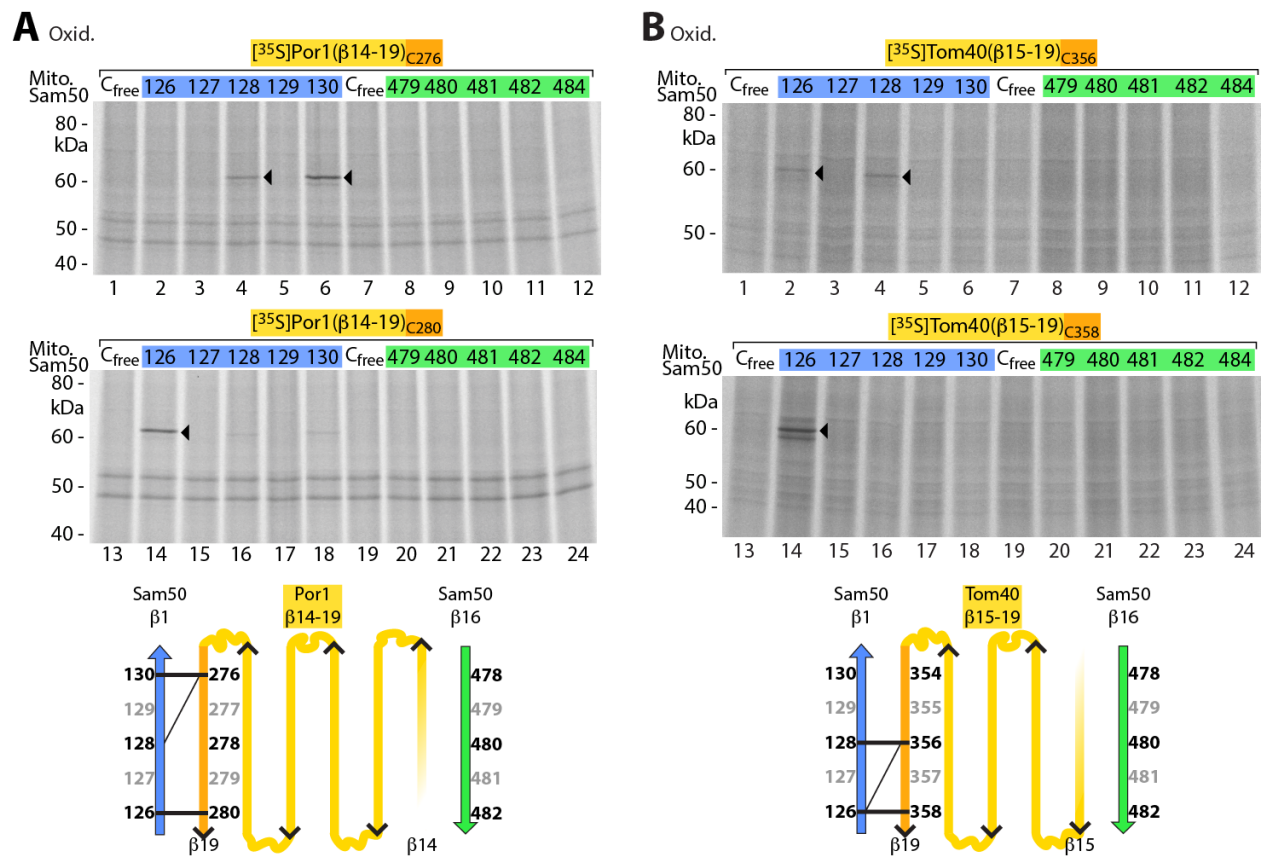

**Fig. S2. Interaction of Sam50 with the C-terminal β signal of Por1 and Tom40 precursors.** (A) [<sup>35</sup>S]Por1(β14-19)<sub>C276</sub> and [<sup>35</sup>S]Por1(β14-19)<sub>C280</sub> were imported into mitochondria of yeast strains expressing the indicated Sam50 variants, followed by oxidation with 4-DPS. Samples were analyzed by non-reducing SDS-PAGE and autoradiography. Arrowheads, cysteine-specific Sam50-precursor adducts. Schematic model (bottom), disulfide bond formation of Sam50 β strand 1 with the β signal (β19) of the Porin precursor β14-19; thick and thin lines indicate strong and weak formation of Sam50-Por1 adducts, respectively. (B) Import of [<sup>35</sup>S]Tom40<sub>C356</sub> or [<sup>35</sup>S]Tom40<sub>C358</sub> precursor containing β strands 15-19 into isolated mitochondria of yeast strains expressing Sam50 variants was analyzed as in (A). Bottom, model of disulfide bond formation between Sam50 β strand 1 and the β signal (β19) of the Tom40 precursor β15-19.

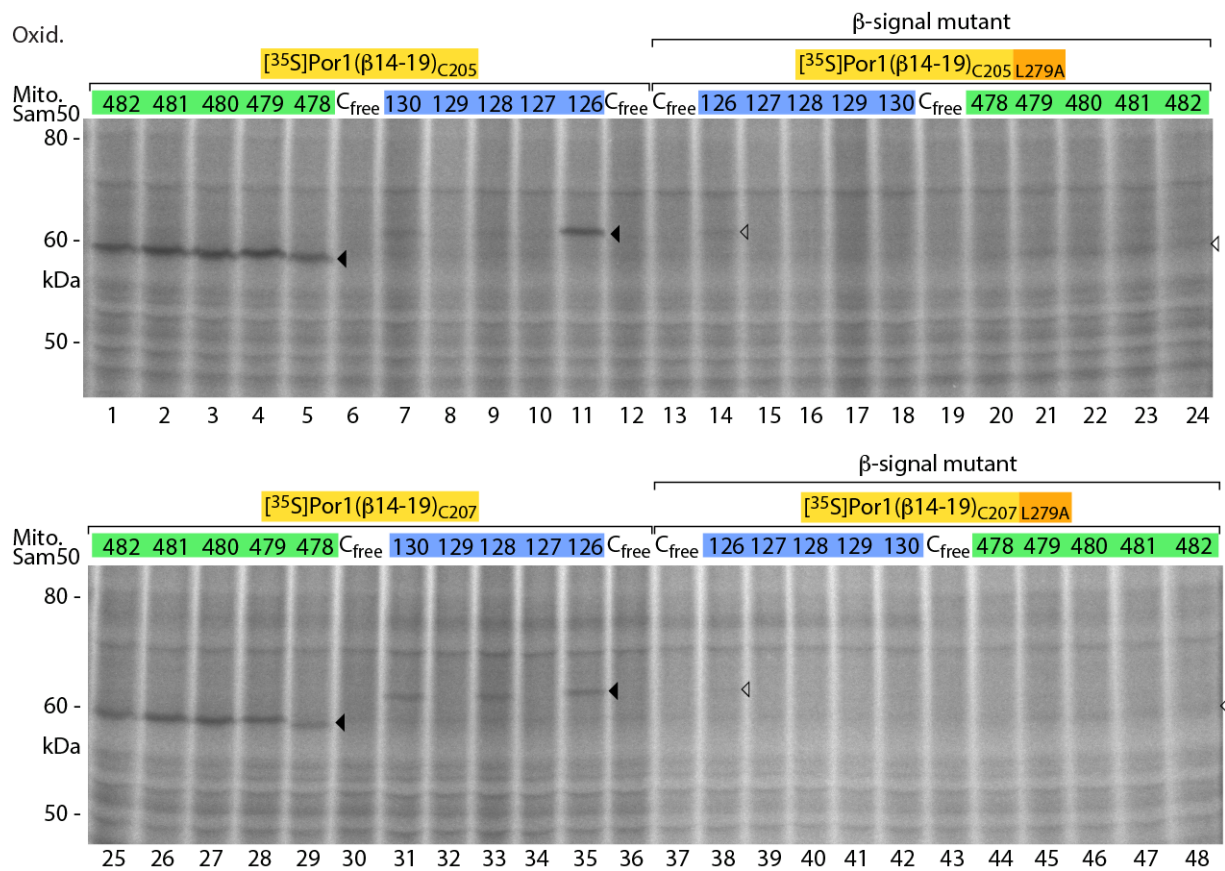

**Fig. S3. A mutant  $\beta$  signal impairs the interaction of Por1 constructs with Sam50.** Radiolabeled Por1( $\beta$ 14-19)<sub>C205</sub>, Por1( $\beta$ 14-19)<sub>C207</sub> and the corresponding  $\beta$ -signal mutants (L279A) were incubated for 5 min with isolated Sam50 cysteine variant mitochondria, followed by oxidation with 4-DPS, non-reducing SDS-PAGE and autoradiography. Arrowheads, cysteine-specific Sam50-Por1 precursor adducts.

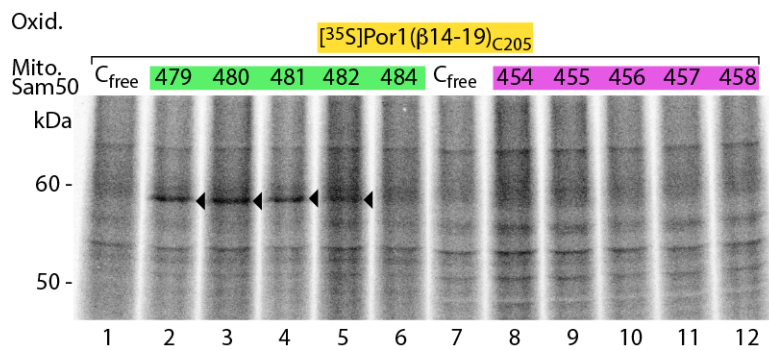

**Fig. S4. Interaction of Por1 precursor with β strand 16 of Sam50.** [<sup>35</sup>S]Por1(β14-19)<sub>C205</sub> was incubated with mitochondria isolated from yeast expressing the indicated Sam50 variants, followed by oxidation with 4-DPS, non-reducing SDS-PAGE and autoradiography. Disulfide formation was observed between the Por1 precursor and Sam50-β16 (arrowheads), but not between Por1 and Sam50-β15.

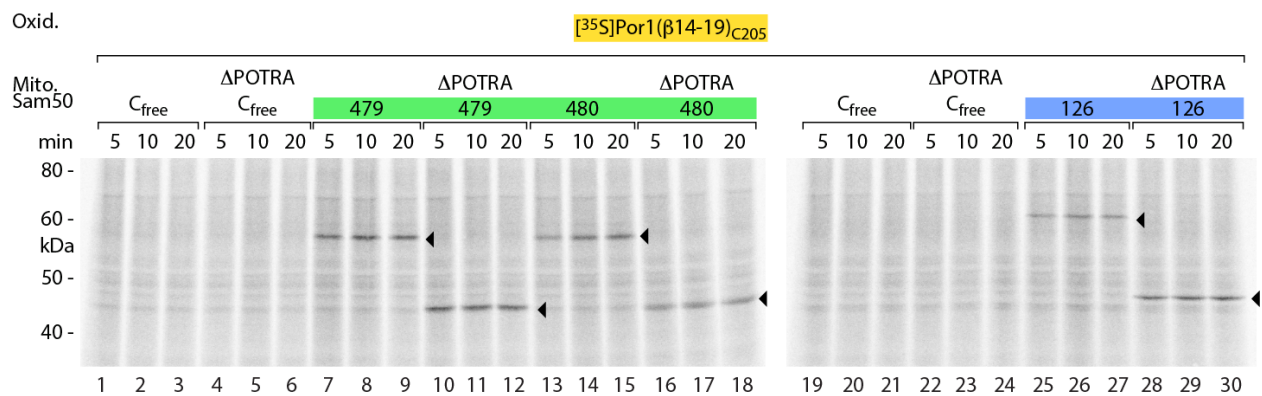

**Fig. S5. The POTRA domain of Sam50 is not required for interaction of the Porin precursor with Sam50.** [<sup>35</sup>S]Por1(β14-19)<sub>C205</sub> was incubated with mitochondria isolated from yeast expressing Sam50 cysteine variants, which lacked the POTRA domain where indicated, for the indicated time. Samples were oxidized using 4-DPS, analyzed by non-reducing SDS-PAGE and autoradiography. Arrowheads, cysteine-specific Sam50-Por1 precursor adducts.

**A**

|       |             |     | $\beta$ 11                                        | loop 6                                      | $\beta$ 12                  |             |     |
|-------|-------------|-----|---------------------------------------------------|---------------------------------------------|-----------------------------|-------------|-----|
| Sam50 | <i>S.c.</i> | 340 | LKNLSSQQSLP                                       | VHICDKFQSGG                                 | PSDIRGFOTFGLGPRDLYDAVGGDAFV | 388         |     |
| Sam50 | <i>H.s.</i> | 320 | GGMLVPIGDKPSSIADRFYLG                             | GPTSIRGF                                    | SMHSIGPQSEGDYLGGEAYW        | 368         |     |
| Sam50 | <i>C.e.</i> | 356 | AKHLKGLGDREVHILDRCYLGGQDVRGF                      | GLNTIGVKADNSCLGGGASL                        |                             | 404         |     |
| BamA  | <i>E.c.</i> | 635 | WGYGDGLGGKEMPFYENFYAGGSSTVRGF                     | QSNTIGPKAVYFPHQASNYD                        |                             | 683         |     |
| BamA  | <i>N.g.</i> | 633 | VGIAGGYGRTKEIPFENFYGGGLGSVRGYESGTLGPKVYDEYGEKISYG |                                             |                             | 682         |     |
| BamA  | <i>H.d.</i> | 634 | LAYTNQF                                           | GGKEVPPFYQLYSAGGMGSLRGFAGGSIGPKAIYYREDGFKAP |                             | 682         |     |
| TamA  | <i>E.c.</i> | 451 | LGWIE                                             | TGDFDKVPPDLRFFAGGDRSIRGYKYKSIAPKYANGDLKGA   | SKI                         | 499         |     |
| FhaC  | <i>B.p.</i> | 424 | SOLGFQYSRQOLLNSYQI                                | ZVGDEYTVR                                   | GYNLRTSQSGD                 | SGVYLSNTLTV | 472 |

\*\*\*\*

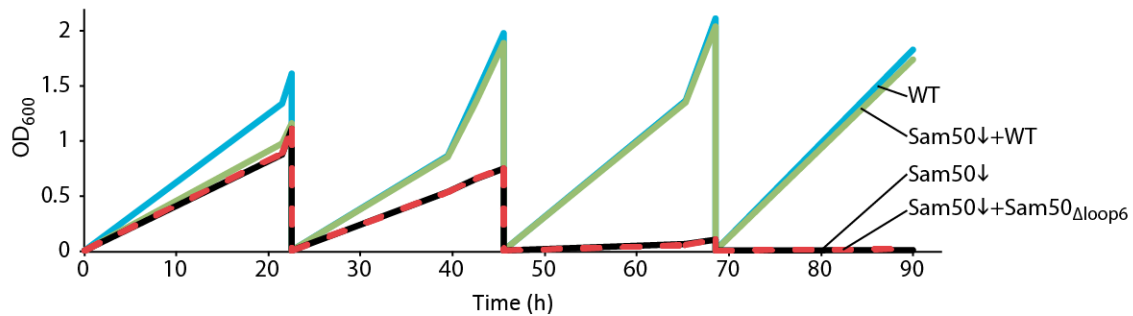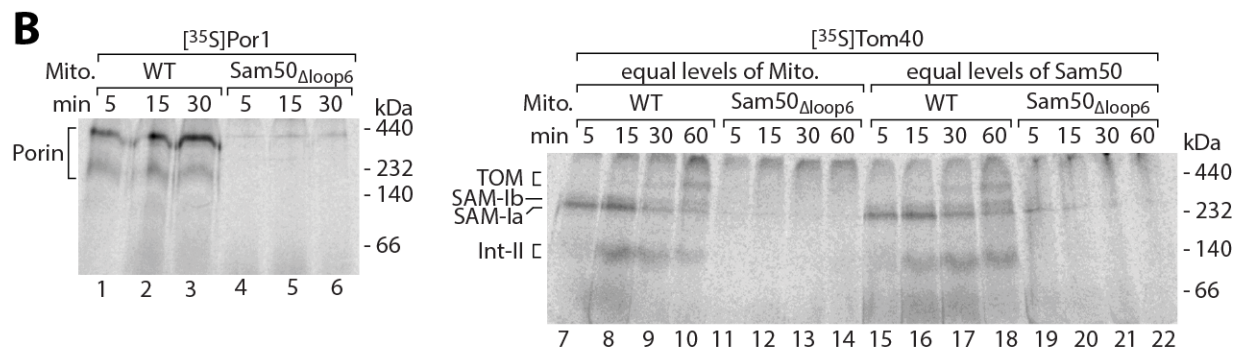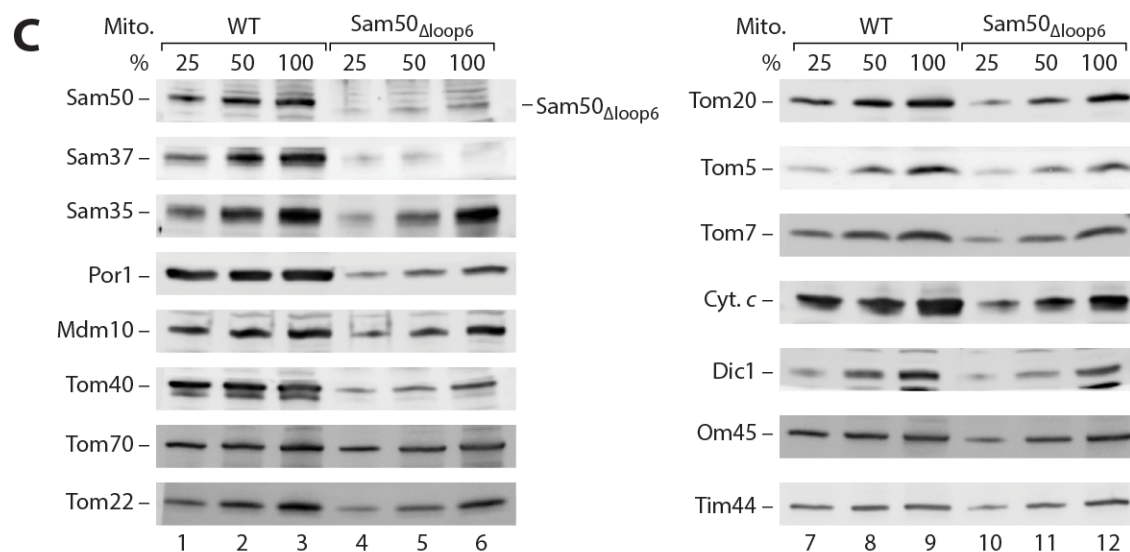

Fig. S6

**Fig. S6. Characterization of Sam50 $_{\Delta\text{loop6}}$  mitochondria.** (A) Upper panel, Omp85 proteins were aligned based on their conserved IRGF motif (dark gray). The amino acid residues affected by the deletion of the conserved part of loop 6 in *S.c.* Sam50 are underlined in red (Sam50 $_{\Delta\text{loop6}}$ ). *S.c.*, *Saccharomyces cerevisiae*; *H.s.*, *Homo sapiens*; *C.e.*, *Caenorhabditis elegans* (P46576, SAM50-like protein gop-3); *E.c.*, *Escherichia coli*; *N.g.*, *Neisseria gonorrhoeae*; *H.d.*, *Haemophilus ducreyi*; *B.p.*, *Bordetella pertussis*. TamA (19); FhaC (78). Lower panel, growth of wild-type (WT, blue), Sam50 $\downarrow$  (*SAM50* down-regulated, black), Sam50 $\downarrow$  expressing *SAM50* WT (green) and Sam50 $\downarrow$  expressing Sam50 $_{\Delta\text{loop6}}$  (red) reveals that Sam50-loop 6 is essential. (B) Assembly of [ $^{35}\text{S}$ ]Por1 and [ $^{35}\text{S}$ ]Tom40 analyzed by blue native PAGE is blocked in Sam50 $_{\Delta\text{loop6}}$  mitochondria. Samples 19-22, the amounts of mitochondria were four-fold increased to compensate for the decreased levels of Sam50 in Sam50 $_{\Delta\text{loop6}}$  mitochondria. (C) Protein levels of WT and Sam50 $_{\Delta\text{loop6}}$  mitochondria were analyzed by SDS-PAGE and immunodecoration.



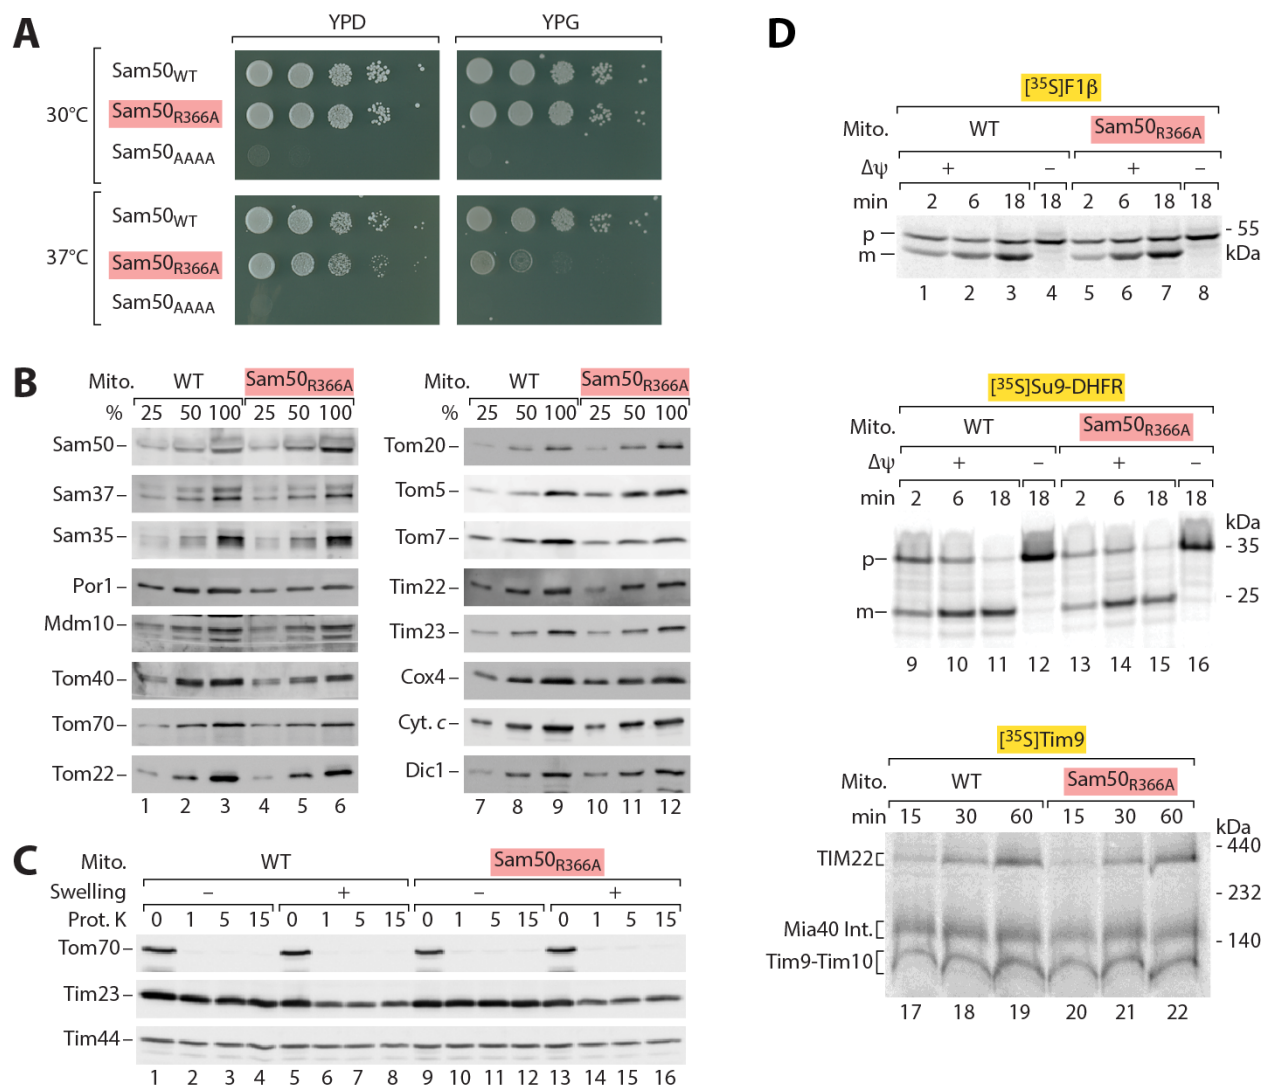

**Fig. S7. Characterization of Sam50-loop 6 IRGF motif variants.** (A) Growth of yeast cells expressing Sam50, Sam50<sub>AAAA</sub> and Sam50<sub>R366A</sub> on fermentable (YPD) and non-fermentable (YPG) medium at 30°C and 37°C. Cells expressing Sam50 with four alanine residues instead of the conserved IRGF motif showed a strong growth defect. Cells expressing Sam50<sub>R366A</sub> showed a temperature sensitive growth behavior on YPG. (B) Growth of wild-type (WT) and Sam50<sub>R366A</sub> cells at permissive temperature (24°C) yielded isolated mitochondria with comparable steady state protein levels of WT and mutant, as analyzed by SDS-PAGE and immunoblotting. (C) The outer membranes of both WT and Sam50<sub>R366A</sub> mitochondria protected internal mitochondrial proteins against proteinase K (Prot. K) under isotonic conditions (- swelling). After disruption of the outer membrane under hypotonic conditions (+ swelling), the intermembrane space exposed protein Tim23 was degraded by the protease as revealed by SDS-PAGE and immunoblotting. The matrix protein Tim44 remained intact under both conditions. Thus, the outer membrane of Sam50<sub>R366A</sub> mitochondria is intact, excluding an indirect inhibition of β-barrel biogenesis caused by a loss of intermembrane space chaperones (57, 58). (D) The presequence-carrying matrix precursors [<sup>35</sup>S]F1β and [<sup>35</sup>S]Su9-DHFR, and the intermembrane space-targeted [<sup>35</sup>S]Tim9 were imported into isolated mitochondria and subjected to SDS-PAGE (lanes 1-16) and blue native PAGE (lanes 17-22), respectively. p, precursor; m, mature; Mia40 Int., Tim9 precursor bound to Mia40.

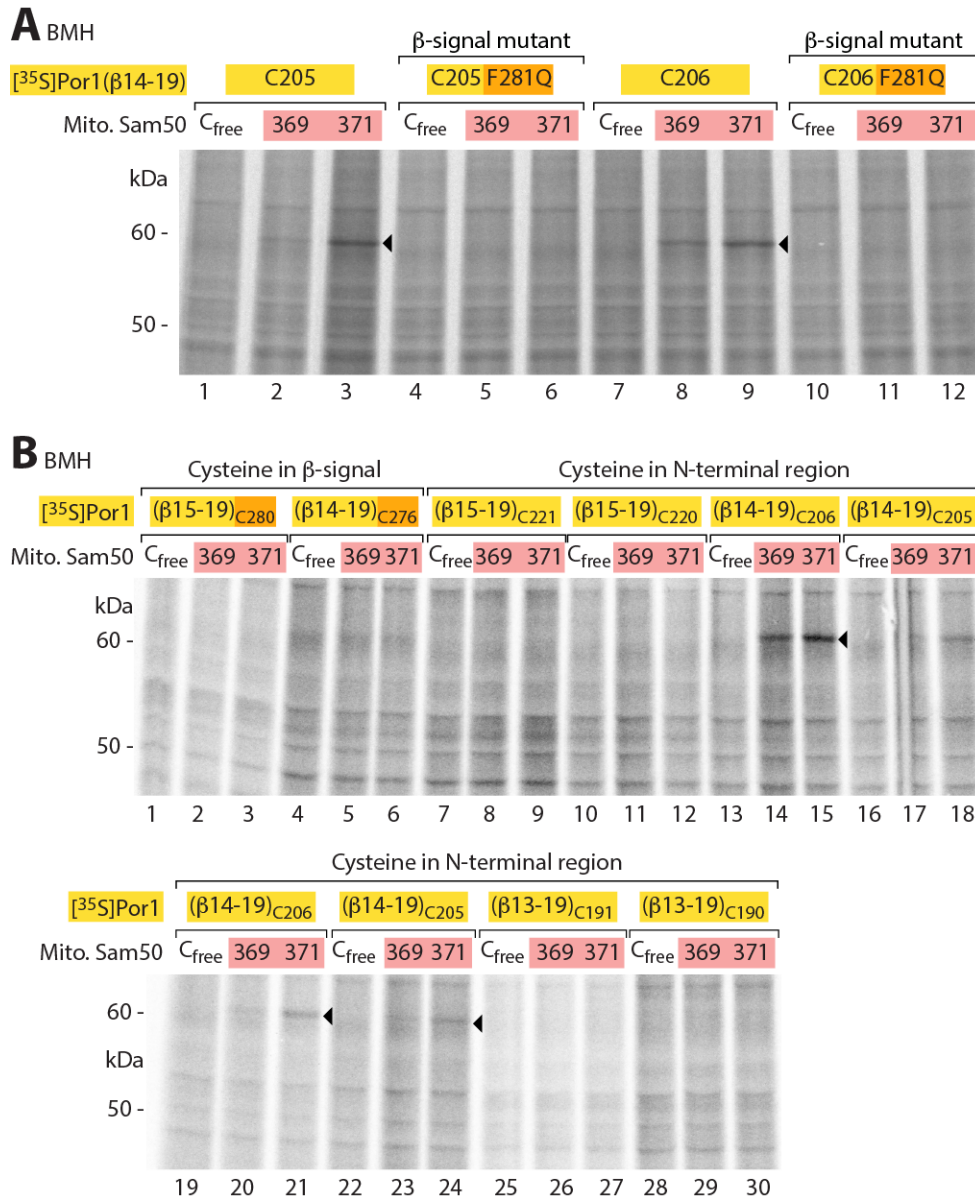

**Fig. S8. Interaction of Sam50-loop 6 with different regions of the Porin precursor.** (A) Radiolabeled Por1(β14-19)<sub>C205</sub>, Por1(β14-19)<sub>C206</sub> and their corresponding β-signal mutant (F281Q) were incubated for 5 min with isolated Sam50 mutant mitochondria as indicated. Samples were treated with BMH and analyzed by non-reducing SDS-PAGE and autoradiography. (B) Radiolabeled Por1 constructs were imported for 5 min into mitochondria as indicated. Samples were treated as in (A). Arrowheads, cysteine-specific Sam50-Por1 precursor adducts.

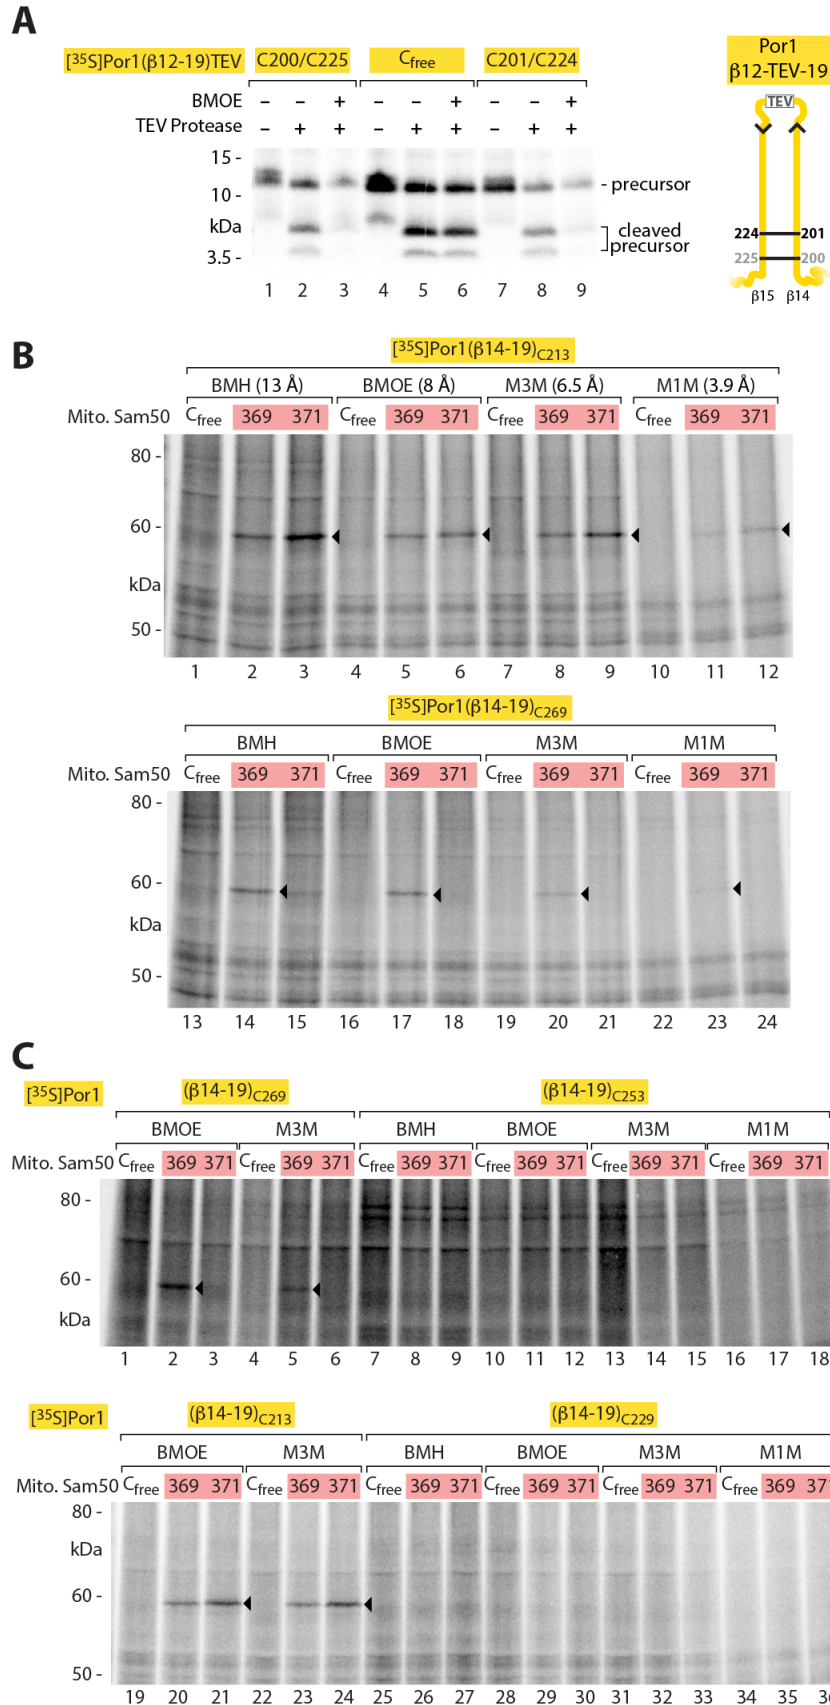

Fig. S9

**Fig. S9. Characterization of Por1 precursor accumulated at SAM.** (A) Radiolabeled Por1 constructs containing a TEV protease cleavage site were imported into Sam50<sub>Cfree</sub> mitochondria for 15 min. Samples were crosslinked using bismaleimidoethane (BMOE). After cleavage by TEV protease, samples were analyzed on a non-reducing Nu-PAGE gel and autoradiography. (Right) Schematic model of the location of the TEV cleavage site and the cysteines used. (B) [<sup>35</sup>S]Por1(β14-19)<sub>C213</sub> and [<sup>35</sup>S]Por1(β14-19)<sub>C269</sub> were imported into mitochondria isolated from yeast cells expressing the indicated Sam50 variants for 5 min. Samples were crosslinked using either BMH, BMOE, 1,3-propanediylbismethanethiosulfonat (M3M) and 1,1-methanediylbismethanethiosulfonat (M1M) as indicated. The length of the crosslinkers is stated in parenthesis. Samples were analyzed by non-reducing SDS-PAGE and autoradiography. (C) Radiolabeled Por1 constructs were imported into Sam50 mutant mitochondria as indicated. Samples were treated as in (B). Arrowheads, cysteine-specific Sam50-Por1 adducts. The findings of (B) and (C) are summarized in Fig. 7B.

**Table S1. List of plasmids used in this study.**

Cf and Cfree, cysteine free.

| Plasmid name                      | Expressed protein            | Promoter     | Vector | Primers for mutagenesis or source                      | Method                    | Template DNA or source                | Number |
|-----------------------------------|------------------------------|--------------|--------|--------------------------------------------------------|---------------------------|---------------------------------------|--------|
| pFL39                             | –                            | –            | pFL39  | –                                                      | –                         | 66                                    | X15    |
| pFL39Sam50                        | Sam50                        | <i>SAM50</i> | pFL39  | –                                                      | –                         | 13                                    | 1699   |
| pFL39Sam50 <sub>R366A</sub>       | Sam50 <sub>R366A</sub>       | <i>SAM50</i> | pFL39  | R366A                                                  | Site-directed mutagenesis | pFL39Sam50                            | 2072   |
| pFL39Sam50 <sub>AAAA</sub>        | Sam50 <sub>AAAA</sub>        | <i>SAM50</i> | pFL39  | AAAA                                                   | Site-directed mutagenesis | pFL39Sam50                            | 2073   |
| pFL39Sam50 <sub>Δloop6</sub>      | Sam50 <sub>Δ353-381</sub>    | <i>SAM50</i> | pFL39  | Δloop6                                                 | Site-directed mutagenesis | pFL39Sam50                            | 2071   |
| pFL39Sam50 <sub>Cfree</sub>       | Sam50 <sub>Cfree</sub>       | <i>SAM50</i> | pFL39  | C76K;<br>C245V;<br>C252G;<br>C292L;<br>C354A;<br>C430H | Site-directed mutagenesis | pFL39Sam50                            | 2690   |
| pFL39Sam50ΔPOTRA <sub>Cfree</sub> | Sam50ΔPOTRA <sub>Cfree</sub> | <i>SAM50</i> | pFL39  | 13                                                     | Site-directed mutagenesis | pFL39Sam50Cf                          | 2773   |
| pFL39Sam50ΔPOTRA <sub>C126</sub>  | Sam50ΔPOTRA <sub>C126</sub>  | <i>SAM50</i> | pFL39  | K126C                                                  | Site-directed mutagenesis | pFL39Sam50<br>ΔPOTRA <sub>Cfree</sub> | 2774   |
| pFL39Sam50ΔPOTRA <sub>C479</sub>  | Sam50ΔPOTRA <sub>C479</sub>  | <i>SAM50</i> | pFL39  | L479C                                                  | Site-directed mutagenesis | pFL39Sam50<br>ΔPOTRA <sub>Cfree</sub> | 2775   |
| pFL39Sam50ΔPOTRA <sub>C480</sub>  | Sam50ΔPOTRA <sub>C480</sub>  | <i>SAM50</i> | pFL39  | G480C                                                  | Site-directed mutagenesis | pFL39Sam50<br>ΔPOTRA <sub>Cfree</sub> | 2776   |
| pFL39Sam50Cf <sub>C478/C126</sub> | Sam50Cf <sub>C478/C126</sub> | <i>SAM50</i> | pFL39  | K126C                                                  | Site-directed mutagenesis | pFL39Sam50Cf <sub>C478</sub>          | 2787   |
| pFL39Sam50Cf <sub>C478/C127</sub> | Sam50Cf <sub>C478/C127</sub> | <i>SAM50</i> | pFL39  | T127C                                                  | Site-directed mutagenesis | pFL39Sam50Cf <sub>C478</sub>          | 2788   |
| pFL39Sam50Cf <sub>C478/C128</sub> | Sam50Cf <sub>C478/C128</sub> | <i>SAM50</i> | pFL39  | G128C                                                  | Site-directed mutagenesis | pFL39Sam50Cf <sub>C478</sub>          | 2789   |
| pFL39Sam50Cf <sub>C478/C129</sub> | Sam50Cf <sub>C478/C129</sub> | <i>SAM50</i> | pFL39  | T129C                                                  | Site-directed mutagenesis | pFL39Sam50Cf <sub>C478</sub>          | 2790   |
| pFL39Sam50Cf <sub>C478/C130</sub> | Sam50Cf <sub>C478/C130</sub> | <i>SAM50</i> | pFL39  | N130C                                                  | Site-directed mutagenesis | pFL39Sam50Cf <sub>C478</sub>          | 2791   |
| pFL39Sam50Cf <sub>C480/C126</sub> | Sam50Cf <sub>C480/C126</sub> | <i>SAM50</i> | pFL39  | K126C                                                  | Site-directed mutagenesis | pFL39Sam50Cf <sub>C480</sub>          | 2708   |
| pFL39Sam50Cf <sub>C480/C127</sub> | Sam50Cf <sub>C480/C127</sub> | <i>SAM50</i> | pFL39  | T127C                                                  | Site-directed mutagenesis | pFL39Sam50Cf <sub>C480</sub>          | 2709   |
| pFL39Sam50Cf <sub>C480/C128</sub> | Sam50Cf <sub>C480/C128</sub> | <i>SAM50</i> | pFL39  | G128C                                                  | Site-directed mutagenesis | pFL39Sam50Cf <sub>C480</sub>          | 2710   |
| pFL39Sam50Cf <sub>C480/C129</sub> | Sam50Cf <sub>C480/C129</sub> | <i>SAM50</i> | pFL39  | T129C                                                  | Site-directed mutagenesis | pFL39Sam50Cf <sub>C480</sub>          | 2711   |
| pFL39Sam50Cf <sub>C480/C130</sub> | Sam50Cf <sub>C480/C130</sub> | <i>SAM50</i> | pFL39  | N130C                                                  | Site-directed mutagenesis | pFL39Sam50Cf <sub>C480</sub>          | 2717   |
| pFL39Sam50Cf <sub>C482/C126</sub> | Sam50Cf <sub>C482/C126</sub> | <i>SAM50</i> | pFL39  | K126C                                                  | Site-directed mutagenesis | pFL39Sam50Cf <sub>C482</sub>          | 2792   |
| pFL39Sam50Cf <sub>C482/C127</sub> | Sam50Cf <sub>C482/C127</sub> | <i>SAM50</i> | pFL39  | T127C                                                  | Site-directed mutagenesis | pFL39Sam50Cf <sub>C482</sub>          | 2793   |
| pFL39Sam50Cf <sub>C482/C128</sub> | Sam50Cf <sub>C482/C128</sub> | <i>SAM50</i> | pFL39  | G128C                                                  | Site-directed mutagenesis | pFL39Sam50Cf <sub>C482</sub>          | 2794   |

|                                   |                              |              |       |                 |                           |                               |      |
|-----------------------------------|------------------------------|--------------|-------|-----------------|---------------------------|-------------------------------|------|
| pFL39Sam50Cf <sub>C482/C129</sub> | Sam50Cf <sub>C482/C129</sub> | <i>SAM50</i> | pFL39 | T129C           | Site-directed mutagenesis | pFL39Sam50Cf <sub>C482</sub>  | 2795 |
| pFL39Sam50Cf <sub>C482/C130</sub> | Sam50Cf <sub>C482/C130</sub> | <i>SAM50</i> | pFL39 | N130C           | Site-directed mutagenesis | pFL39Sam50Cf <sub>C482</sub>  | 2796 |
| pFL39Sam50Cf <sub>C126</sub>      | Sam50Cf <sub>C126</sub>      | <i>SAM50</i> | pFL39 | K126C           | Site-directed mutagenesis | pFL39Sam50 <sub>Cfree</sub>   | 2691 |
| pFL39Sam50Cf <sub>C127</sub>      | Sam50Cf <sub>C127</sub>      | <i>SAM50</i> | pFL39 | T127C           | Site-directed mutagenesis | pFL39Sam50 <sub>Cfree</sub>   | 2692 |
| pFL39Sam50Cf <sub>C128</sub>      | Sam50Cf <sub>C128</sub>      | <i>SAM50</i> | pFL39 | G128C           | Site-directed mutagenesis | pFL39Sam50 <sub>Cfree</sub>   | 2693 |
| pFL39Sam50Cf <sub>C129</sub>      | Sam50Cf <sub>C129</sub>      | <i>SAM50</i> | pFL39 | T129C           | Site-directed mutagenesis | pFL39Sam50 <sub>Cfree</sub>   | 2694 |
| pFL39Sam50Cf <sub>C130</sub>      | Sam50Cf <sub>C130</sub>      | <i>SAM50</i> | pFL39 | N130C           | Site-directed mutagenesis | pFL39Sam50 <sub>Cfree</sub>   | 2695 |
| pFL39Sam50Cf <sub>C369</sub>      | Sam50Cf <sub>C369</sub>      | <i>SAM50</i> | pFL39 | Q369C           | Site-directed mutagenesis | pFL39Sam50 <sub>Cfree</sub>   | 2718 |
| pFL39Sam50Cf <sub>C371</sub>      | Sam50Cf <sub>C371</sub>      | <i>SAM50</i> | pFL39 | F371C           | Site-directed mutagenesis | pFL39Sam50 <sub>Cfree</sub>   | 2719 |
| pFL39Sam50Cf <sub>C454</sub>      | Sam50Cf <sub>C454</sub>      | <i>SAM50</i> | pFL39 | R454C           | Site-directed mutagenesis | pFL39Sam50 <sub>Cfree</sub>   | 2800 |
| pFL39Sam50Cf <sub>C455</sub>      | Sam50Cf <sub>C455</sub>      | <i>SAM50</i> | pFL39 | F455C           | Site-directed mutagenesis | pFL39Sam50 <sub>Cfree</sub>   | 2797 |
| pFL39Sam50Cf <sub>C456</sub>      | Sam50Cf <sub>C456</sub>      | <i>SAM50</i> | pFL39 | E456C           | Site-directed mutagenesis | pFL39Sam50 <sub>Cfree</sub>   | 2798 |
| pFL39Sam50Cf <sub>C457</sub>      | Sam50Cf <sub>C457</sub>      | <i>SAM50</i> | pFL39 | L457C           | Site-directed mutagenesis | pFL39Sam50 <sub>Cfree</sub>   | 2799 |
| pFL39Sam50Cf <sub>C458</sub>      | Sam50Cf <sub>C458</sub>      | <i>SAM50</i> | pFL39 | N458C           | Site-directed mutagenesis | pFL39Sam50 <sub>Cfree</sub>   | 2801 |
| pFL39Sam50Cf <sub>C478</sub>      | Sam50Cf <sub>C478</sub>      | <i>SAM50</i> | pFL39 | G478C           | Site-directed mutagenesis | pFL39Sam50 <sub>Cfree</sub>   | 2701 |
| pFL39Sam50Cf <sub>C479</sub>      | Sam50Cf <sub>C479</sub>      | <i>SAM50</i> | pFL39 | L479C           | Site-directed mutagenesis | pFL39Sam50 <sub>Cfree</sub>   | 2702 |
| pFL39Sam50Cf <sub>C480</sub>      | Sam50Cf <sub>C480</sub>      | <i>SAM50</i> | pFL39 | G480C           | Site-directed mutagenesis | pFL39Sam50 <sub>Cfree</sub>   | 2703 |
| pFL39Sam50Cf <sub>C481</sub>      | Sam50Cf <sub>C481</sub>      | <i>SAM50</i> | pFL39 | L481C           | Site-directed mutagenesis | pFL39Sam50 <sub>Cfree</sub>   | 2704 |
| pFL39Sam50Cf <sub>C482</sub>      | Sam50Cf <sub>C482</sub>      | <i>SAM50</i> | pFL39 | A482C           | Site-directed mutagenesis | pFL39Sam50 <sub>Cfree</sub>   | 2705 |
| pFL39Sam50Cf <sub>C484</sub>      | Sam50Cf <sub>C484</sub>      | <i>SAM50</i> | pFL39 | L484C           | Site-directed mutagenesis | pFL39Sam50 <sub>Cfree</sub>   | 2707 |
| pFL39Por1                         | Por1                         | <i>POR1</i>  | pFL39 | –               | –                         | Wiedemann/Pfanner Labs        | 1696 |
| pFL39Por1 <sub>Cfree</sub>        | Por1 <sub>Cfree</sub>        | <i>POR1</i>  | pFL39 | –               | –                         | 39                            | 1987 |
| pFL39Por1TEV <sub>Cfree</sub>     | Por1TEV <sub>Cfree</sub>     | <i>POR1</i>  | pFL39 | TEV             | Site-directed mutagenesis | pFL39Por1 <sub>Cfree</sub>    | 2780 |
| pFL39Por1TEV <sub>C200/C225</sub> | Por1TEV <sub>C200/C225</sub> | <i>POR1</i>  | pFL39 | L200C;<br>Y225C | Site-directed mutagenesis | pFL39Por1TEV <sub>Cfree</sub> | 2781 |
| pFL39Por1TEV <sub>C201/C224</sub> | Por1TEV <sub>C201/C224</sub> | <i>POR1</i>  | pFL39 | Q201C;<br>R224C | Site-directed mutagenesis | pFL39Por1TEV <sub>Cfree</sub> | 2782 |
| pFL39Por1Cf <sub>C51</sub>        | Por1Cf <sub>C51</sub>        | <i>POR1</i>  | pFL39 | D51C            | Site-directed mutagenesis | pFL39Por1 <sub>Cfree</sub>    | 2787 |
| pFL39Por1Cf <sub>C220</sub>       | Por1Cf <sub>C220</sub>       | <i>POR1</i>  | pFL39 | E220C           | Site-directed mutagenesis | pFL39Por1 <sub>Cfree</sub>    | 2685 |
| pFL39Por1Cf <sub>C221</sub>       | Por1Cf <sub>C221</sub>       | <i>POR1</i>  | pFL39 | F221C           | Site-directed mutagenesis | pFL39Por1 <sub>Cfree</sub>    | 2684 |
| pFL39Por1Cf <sub>C204</sub>       | Por1Cf <sub>C204</sub>       | <i>POR1</i>  | pFL39 | A204C           | Site-directed mutagenesis | pFL39Por1 <sub>Cfree</sub>    | 2688 |
| pFL39Por1Cf <sub>C205</sub>       | Por1Cf <sub>C205</sub>       | <i>POR1</i>  | pFL39 | K205C           | Site-directed mutagenesis | pFL39Por1 <sub>Cfree</sub>    | 2687 |
| pFL39Por1Cf <sub>C206</sub>       | Por1Cf <sub>C206</sub>       | <i>POR1</i>  | pFL39 | A206C           | Site-directed mutagenesis | pFL39Por1 <sub>Cfree</sub>    | 2686 |
| pFL39Por1Cf <sub>C207</sub>       | Por1Cf <sub>C207</sub>       | <i>POR1</i>  | pFL39 | T207C           | Site-directed mutagenesis | pFL39Por1 <sub>Cfree</sub>    | 2802 |

|                                  |                                   |              |           |       |                           |                             |      |
|----------------------------------|-----------------------------------|--------------|-----------|-------|---------------------------|-----------------------------|------|
| pFL39Por1Cf <sub>C159</sub>      | Por1Cf <sub>C159</sub>            | <i>POR1</i>  | pFL39     | A159C | Site-directed mutagenesis | pFL39Por1C <sub>free</sub>  | 2779 |
| pFL39Por1Cf <sub>C213</sub>      | Por1Cf <sub>C213</sub>            | <i>POR1</i>  | pFL39     | P213C | Site-directed mutagenesis | pFL39Por1C <sub>free</sub>  | 2783 |
| pFL39Por1Cf <sub>C229</sub>      | Por1Cf <sub>C229</sub>            | <i>POR1</i>  | pFL39     | A229C | Site-directed mutagenesis | pFL39Por1C <sub>free</sub>  | 2786 |
| pFL39Por1Cf <sub>C253</sub>      | Por1Cf <sub>C253</sub>            | <i>POR1</i>  | pFL39     | P253C | Site-directed mutagenesis | pFL39Por1C <sub>free</sub>  | 2785 |
| pFL39Por1Cf <sub>C269</sub>      | Por1Cf <sub>C269</sub>            | <i>POR1</i>  | pFL39     | S269C | Site-directed mutagenesis | pFL39Por1C <sub>free</sub>  | 2784 |
| pFL39Por1Cf <sub>C276</sub>      | Por1Cf <sub>C276</sub>            | <i>POR1</i>  | pFL39     | G276C | Site-directed mutagenesis | pFL39Por1C <sub>free</sub>  | 2677 |
| pFL39Por1Cf <sub>C277</sub>      | Por1Cf <sub>C277</sub>            | <i>POR1</i>  | pFL39     | W277C | Site-directed mutagenesis | pFL39Por1C <sub>free</sub>  | 2676 |
| pFL39Por1Cf <sub>C278</sub>      | Por1Cf <sub>C278</sub>            | <i>POR1</i>  | pFL39     | S278C | Site-directed mutagenesis | pFL39Por1C <sub>free</sub>  | 2675 |
| pFL39Por1Cf <sub>C280</sub>      | Por1Cf <sub>C280</sub>            | <i>POR1</i>  | pFL39     | S280C | Site-directed mutagenesis | pFL39Por1C <sub>free</sub>  | 2673 |
| pFL39Tom40 <sub>Cfree</sub>      | Tom40 <sub>Cfree</sub>            | <i>TOM40</i> | pFL39     | –     | –                         | 39                          | 2104 |
| pFL39Tom40Cf <sub>C356</sub>     | Tom40Cf <sub>C356</sub>           | <i>TOM40</i> | pFL39     | G356C | Site-directed mutagenesis | pFL39Tom40 <sub>Cfree</sub> | 2720 |
| pFL39Tom40Cf <sub>C87/C358</sub> | Tom40Cf <sub>C87/C359</sub>       | <i>TOM40</i> | pFL39     | –     | –                         | 39                          | 2010 |
| pGEM-4Z-Tom40                    | Tom40                             | <i>SP6</i>   | pGEM-4Z   | –     | –                         | Wiedemann/Pfanner Labs      | 1495 |
| pGEM-4Z-Por1                     | Por1                              | <i>SP6</i>   | pGEM-4Z   | –     | –                         | Wiedemann/Pfanner Labs      | P14  |
| pSP64-F1β                        | F1β                               | <i>SP6</i>   | pSP64     | –     | –                         | Wiedemann/Pfanner Labs      | F01  |
| pGEM-4Z-Mdm10                    | Mdm10                             | <i>SP6</i>   | pGEM-4Z   | –     | –                         | Wiedemann/Pfanner Labs      | 2148 |
| pGEM-4Z-Su9-DHFR                 | Su9-DHFR                          | <i>SP6</i>   | pGEM-4Z   | –     | –                         | Wiedemann/Pfanner Labs      | S02  |
| pGEM-4Z-Tim9                     | Tim9                              | <i>SP6</i>   | pGEM-4Z   | –     | –                         | Wiedemann/Pfanner Labs      | JR59 |
| pGEX-4T-1-GST-β-signalPor1       | GST-β-signal <sub>Por1</sub>      | <i>tac</i>   | pGEX-4T-1 | –     | –                         | 13                          | 1719 |
| pGEX-4T-1-GST-β-signalPor1F281Q  | GST-β-signal <sub>Por1F281Q</sub> | <i>tac</i>   | pGEX-4T-1 | –     | –                         | 13                          | 1720 |
| pFA6AHis3MX6-pGal1               | –                                 | –            | pFA6      | –     | –                         | 68                          | 1439 |

**Table S2. List of primers.**

For cloning (codons causing amino acid exchange are underlined).

| Mutation     |                                    | Primer forward                                                       | Primer reverse                                                    |
|--------------|------------------------------------|----------------------------------------------------------------------|-------------------------------------------------------------------|
| Gene         | Position                           |                                                                      |                                                                   |
| <i>SAM50</i> | R366A                              | GGTGGGCCCCAGCGACATT <u>GC</u><br>GGGGTTTCAA                          | TTGAAACCCCGCAATGTCGC<br>TGGGCCACC                                 |
|              | AAAA                               | CAGAGTGGTGGGCCAGCG<br>AC <u>GCTGCGGCGGCT</u> CAAACA<br>TTTGGGTTAGGCC | GGGCCTAACCCAAATGTTT<br><u>AGCCGCCG</u> CAGCGTCGCTGG<br>GCCCACTCTG |
|              | Δloop6                             | CTCACAACAATCCTTGCCTG<br>TAGGTGGTGTGCTTTT                             | CAAAAGCATCACCACCTACA<br>GGCAAGGATTGTTGTGAG                        |
|              | C76K                               | TAAGAGATTGA <u>AAG</u> CAACAC<br>CACATTG                             | TGTGGTGTGCTTCAATCTCT<br>TATTTAAC                                  |
|              | C245V                              | TTTAGAGACCGTCTGGAGAT<br>CC                                           | GGATCTCCAG <u>AC</u> GGTCTCTA<br>AC                               |
|              | C252G                              | CACTAAGATAGGTTCAACAAG<br>G                                           | CCTTGTGA <u>AC</u> CTATCTTAGTG                                    |
|              | C292L                              | TCATATTATGCTCCCTACTA<br>AG                                           | ACCCTTAGTAGGG <u>GAG</u> CATAA<br>TATGATC                         |
|              | C354A                              | TGTACATATAGCTGATAAGT<br>TTC                                          | TGAAACTTATCAGCTATATG<br>TAC                                       |
|              | C430H                              | GTTGGGTAATC <u>AC</u> ATAGGAC<br>A                                   | CTGTCCTATGTGATTACCCA<br>A                                         |
|              | K126C                              | GTTTACAGCGTGCACAGGGA<br>CAAATTTGGG                                   | GTCCCTGTGCACGCTGTAAA<br>CGTTTTAGGAG                               |
|              | T127C                              | CAGCGAAGTGCGGGACAAA<br>TTTTGGGAACGATAATG                             | CCAAAATTTGTCCGCACTTC<br>GCTGTAAACGTTTTAGG                         |
|              | G128C                              | GAAGACATGCACAAATTTG<br>GGAACGATAATG                                  | CCAAAATTTGTGCATGTCTTC<br>GCTGTAAACG                               |
|              | T129C                              | GACAGGGTGC AATTTGGGA<br>ACGATAATGATGC                                | CCAAAATTGCACCTGTCTT<br>CGCTGTAAACG                                |
|              | N130C                              | GGACATGTTTTGGGAACGAT<br>AATGATGC                                     | CCAAAACATGTCCCTGTCTT<br>CGCTG                                     |
|              | Q369C                              | GGGTTTTGTACATTTGGGTT<br>AGG                                          | CAAATGTACAAAACCCCGA<br>ATG                                        |
|              | F371C                              | CAAACATGTGGGTTAGGCC                                                  | CTAACCCACATGTTTGAAC<br>CC                                         |
|              | R454C                              | CACCCAATGGCATGTTTCGA<br>GCTAAACTTTACTTTGC                            | GTTTAGCTCGAAACATGCCA<br>TTGGGTGCCTTAG                             |
|              | F455C                              | CAATGGCAAGATGCGAGCT<br>AAACTTTAC                                     | GTTTAGCTCGCATCTTGCCAT<br>TGGGTG                                   |
| E456C        | GCAAGATTCTGTCTAACTT<br>TACTTTGCC   | GTAAAGTTTAGACAGAATCT<br>TGCCATTGG                                    |                                                                   |
| L457C        | GCAAGATTCGAGTGTA ACTT<br>TACTTTGCC | GTAAAGTTACTCGAATCT<br>TGCCATTG                                       |                                                                   |



| Mutation     |                                   | Primer forward                                                                | Primer reverse                                                                |
|--------------|-----------------------------------|-------------------------------------------------------------------------------|-------------------------------------------------------------------------------|
| Gene         | Position                          |                                                                               |                                                                               |
| <i>SAM50</i> | N458C                             | GATTCGAGCTATGCTTTACT<br>TTGCCTATTACCGCTC                                      | CAAAGTAAAGCATAGCTCGA<br>ATCTTGCCATTGGG                                        |
|              | G478C                             | CCAGTTTTGTCTTGGTCTGG<br>CATT                                                  | GACCAAGACAAAACCTGGAAT<br>CCTTTTC                                              |
|              | L479C                             | CCAGTTTGGTTGTGGTCTGG<br>CATTTTATAAG                                           | CCAGACCACAACCAAACCTGG<br>AATCCTTTTC                                           |
|              | G480C                             | GGTCTTTGTCTGGCATTTTTA<br>TAAGAATAC                                            | GCCAGACAAAGACCAAACCTG<br>GAATCC                                               |
|              | L481C                             | CTTGGTTGCGCATTTTTATA<br>AGAATACATTC                                           | CTTATAAAAATGCGCAACCA<br>AGACCAAACCTG                                          |
|              | A482C                             | GGTCTGTGCTTTTATAAGA<br>ATACATTC                                               | CTTATAAAAAGCACAGACCA<br>AGACCAAACCTG                                          |
|              | L484C                             | GGCATTTTGTTAAGAATACA<br>TTCCTTTTAATG                                          | GTATTCTTAACAATAATGCCA<br>GACCAAGAC                                            |
| <i>POR1</i>  | TEV                               | GAACTCCAAACTACCTGAAA<br>ATTTGTATTTCAAGGTAAC<br>TCCAATGTCAACATCGAATT<br>CGCCAC | GTTGACATTGGAGTTACCTT<br>GAAAATACAAATTTTCAGGT<br>AGTTTGGAGTTCATTGTAGC<br>CTTAG |
|              | D51C                              | CAGCCTGTCAAATGCGGTCC<br>ACTGTCTACTAAC                                         | CAGTGGACCGCATTTGACAG<br>GCTGTTTAGCCTTC                                        |
|              | G203C                             | CTTTTACAGGTCTGTGCTA<br>AGGCTACAATGAAC                                         | GTAGCCTTAGCACAGACCTG<br>TAAAAGGCGTTG                                          |
|              | A204C                             | CAGGTCGGTTGTAAGGCTAC<br>AATGAACTCC                                            | CATTGTAGCCTTACAACCGA<br>CCTGTAAAAAGG                                          |
|              | K205C                             | GGTCGGTGCTTGTGCTACAA<br>TGAACTCCAAAC                                          | G TTCATTGTAGCACAAGCAC<br>CGACCTGTAAAAAGG                                      |
|              | A206C                             | GGTGCTAAGTGTACAATGAA<br>CTCCAAACTACC                                          | GGAGTTCATTGTACACTTAG<br>CACCGACCTG                                            |
|              | T207C                             | GTCGGTGCTAAGGCTTGTAT<br>GAACTCCAAACTACCTAAC                                   | GTTTGGAGTTCATACAAGCC<br>TTAGCACCGACCTG                                        |
|              | A159C                             | CGATATCAGCTGCGGTTCCA<br>TTTCTCGTTATGC                                         | GAAATGGAACCGCAGCTGAT<br>ATCGTAACCAAACCTC                                      |
|              | L200C                             | CAACGCCTTTTGTTCAGGTCG<br>GTGCTAAGG                                            | CACCGACCTGACAAAAGGCG<br>TTGACGTTTTG                                           |
|              | Q201C                             | GCCTTTTTATGTGTCGGTGCT<br>AAGGCTACAATG                                         | GCACCGACACATAAAAAGGC<br>GTTGACGTTTTG                                          |
|              | P213C                             | CTCCAAACTATGTAACCTCCA<br>ATGTCAACATCG                                         | CATTGGAGTTACATAGTTTG<br>GAGTTCATTGTAGC                                        |
|              | E220C                             | GTCAACATCTGTTTCGCCAC<br>TAGATATTTGCC                                          | CTAGTGGCGAAACAGATGTT<br>GACATTGGAG                                            |
|              | F221C                             | CATCGAATGCGCCACTAGAT<br>ATTTGCCTGATG                                          | CTAGTGGCGCATTTCGATGTT<br>GACATTGGAG                                           |
|              | R224C                             | ATTCGCCACTTGTATTATTGCC<br>TGATGCATCTTC                                        | CAGGCAAATAACAAGTGGCG<br>AATTCGATGTTG                                          |
| Y225C        | CCACTAGATGTTTGCCTGAT<br>GCATCTTCC | CAGGCAAACATCTAGTGGCG<br>AATTCGATG                                             |                                                                               |

| Mutation                           |          | Primer forward                                                                              | Primer reverse                                                                            |
|------------------------------------|----------|---------------------------------------------------------------------------------------------|-------------------------------------------------------------------------------------------|
| Gene                               | Position |                                                                                             |                                                                                           |
| <b>POR1</b>                        | A229C    | TATTTGCCTGAT <u>TGCT</u> CTTCC<br>CAAGTTAAGG                                                | CTTGGGAAGAGCAATCAGGC<br>AAATATCTAG                                                        |
|                                    | V253C    | ATTGTTAAGAT <u>TGTGG</u> CGTCA<br>CTCTGGGTG                                                 | GAGTGACGCC <u>CACAT</u> CTTAAC<br>AATTGCTTG                                               |
|                                    | S269C    | CTTTGAAGTT <u>TGTGTGA</u> ACCT<br>GTTCAACAAGCTAG                                            | GAACAGGTT <u>CACACA</u> ACTTC<br>AAAGCATCGAAAG                                            |
|                                    | G276C    | CACAAGCTAT <u>TGT</u> TGGTCTTT<br>GTCCTTCGAC                                                | CAAAGACCA <u>ACATAG</u> CTTGT<br>GAACAGGTTCAAG                                            |
|                                    | W277C    | CTAGGT <u>TGTTCT</u> TTGTCCTTC<br>GACGCTTG                                                  | GGACAAAGA <u>ACAAC</u> CTAGCT<br>TGTGAACAGG                                               |
|                                    | S278C    | GCTAGGT <u>TGGTGT</u> TTGTCCT<br>TCGACGCTTG                                                 | CGAAGGACAA <u>CACCA</u> ACCT<br>AGCTTGTGAAC                                               |
|                                    | S280C    | GTCTTT <u>TGTGCT</u> TCGACGCTT<br>GAACGTATATATC                                             | CGTCGAAGC <u>ACA</u> AAGACCAA<br>CCTAGCTTG                                                |
| <b>TOM40</b>                       | G356C    | GATTGGTTTCT <u>TGT</u> CTACAAT<br>TTGAAACTGCTGG                                             | CAAATTGTAG <u>ACAG</u> AAACCA<br>ATCTTGGTATCG                                             |
| <b>HIS3-<br/>Gall<sub>pr</sub></b> | R2       | –                                                                                           | GAAAATTGGCATCGGGCTGT<br>CTAAGGAAATCTCATTATCA<br>ACACCAGATGATGAGGTCAT<br>TTTGAGATCCGGGTTTT |
|                                    | F4       | GGATGCGTTTTACGTGGCAA<br>AAGTTTTGATGCCAAATAGA<br>CAAAGTAGCTCAATTCAAC<br>GAATTCGAGCTCGTTTAAAC | –                                                                                         |

For in vitro transcription.

| Name                                   | Sequence                                                              | Primer range<br>(full amino acids) | Gene        | Cys |
|----------------------------------------|-----------------------------------------------------------------------|------------------------------------|-------------|-----|
| WG-Por1-rev<br>(only Fig. 1C)          | TGATGATGAGAACCCCCCCC-TTA-<br>AGCGTCGAAGGACAAAGAC                      | 278-283                            | <i>POR1</i> | -   |
| WG-Por1-b15(C210)-fw<br>(only Fig. 1C) | CTTTAAGAAGGAGATATACC-ATG-<br>TGCAAACCTACCTAACTCCAATG                  | 210-216                            | <i>POR1</i> | 210 |
| rWG-Por1-rev                           | TGATGATGAGAACCCCCCCC-TCA-CATCATCAT-<br>AGCGTCGAAGGACAAAGACCAAC        | 277-283                            | <i>POR1</i> | -   |
| rWG-Por1-b15-fw                        | CTTTAAGAAGGAGATATACC-ATG-<br>AAACTACCTAACTCCAATGTC                    | 211-216                            | <i>POR1</i> | -   |
| rWG-Por1-b14-fw                        | CTTTAAGAAGGAGATATACC-ATG-ATGATG-<br>AACGTCAACGCCTTTTTACAG             | 195-201                            | <i>POR1</i> | -   |
| rWG-Por1-b13-fw                        | CTTTAAGAAGGAGATATACC-ATG-ATGATG-<br>AACGAGCAAATAACTACCGTTG            | 184-190                            | <i>POR1</i> | -   |
| rWG-Por1-b13(C190)-fw                  | CTTTAAGAAGGAGATATACC-ATG-ATGATG-<br>AACGAGCAAATAACTACCTGTGACTTCTTCC   | 184-194                            | <i>POR1</i> | 190 |
| rWG-Por1-b13(C191)-fw                  | CTTTAAGAAGGAGATATACC-ATG-ATGATG-<br>AACGAGCAAATAACTACCGTTTGTCTTCTTCC  | 184-194                            | <i>POR1</i> | 191 |
| rWG-Por1-b12-fw                        | CTTTAAGAAGGAGATATACC-ATG-ATGATG-<br>GCCAAAGACTACTCCTTGG               | 173-178                            | <i>POR1</i> | -   |
| rWG-Por1-b12(C179)-fw                  | CTTTAAGAAGGAGATATACC-ATG-ATGATG-<br>GCCAAAGACTACTCCTTGTGCGCTACATTGAAC | 173-183                            | <i>POR1</i> | 179 |
| rWG-Por1-b12(C180)-fw                  | CTTTAAGAAGGAGATATACC-ATG-ATGATG-<br>GCCAAAGACTACTCCTTGGGCTGTACATTGAAC | 173-183                            | <i>POR1</i> | 180 |

| Name                     | Sequence                                                            | Primer range<br>(full amino acids) | Gene         | Cys |
|--------------------------|---------------------------------------------------------------------|------------------------------------|--------------|-----|
| rWG-Por1-b11-fw          | CTTTAAGAAGGAGATATACC-ATG-ATGATG-ATCAGCGCCGGTTCCATTTTC               | 157-162                            | <i>POR1</i>  | -   |
| rWG-Por1-b10-fw          | CTTTAAGAAGGAGATATACC-ATG-ATGATG-GAAGGTATTGTTGGTGGCGCAGAG            | 145-152                            | <i>POR1</i>  | -   |
| rWG-Por1-b9-fw           | CTTTAAGAAGGAGATATACC-ATG-ATGATG-TCACCAACATTTGTTGGTGACTIONAAC        | 133-139                            | <i>POR1</i>  | -   |
| rWG-Por1-b8-fw           | CTTTAAGAAGGAGATATACC-ATG-ATGATG-CAACCTTTCTTCACCGCAAG                | 118-123                            | <i>POR1</i>  | -   |
| rWG-Por1-b7-fw           | CTTTAAGAAGGAGATATACC-ATG-ATGATG-ACTCCAGGCGTCGCCAAG                  | 103-108                            | <i>POR1</i>  | -   |
| rWG-Por1-b6-fw           | CTTTAAGAAGGAGATATACC-ATG-ATGATG-AACTTGACCCCTGGTCTAAAG               | 89-95                              | <i>POR1</i>  | -   |
| rWG-Por1-b5-fw           | CTTTAAGAAGGAGATATACC-ATG-ATGATG-AACACAAACAACCTTGCAAACCAAATTAGAGTTTG | 77-87                              | <i>POR1</i>  | -   |
| rWG-Por1-b4-fw           | CTTTAAGAAGGAGATATACC-ATG-ATGATG-GACAAGCAAACCGGCTTGG                 | 63-69                              | <i>POR1</i>  | -   |
| rWG-Por1-b3-fw           | CTTTAAGAAGGAGATATACC-ATG-ATGATG-GGTCCACTGTCTACTAACG                 | 52-57                              | <i>POR1</i>  | -   |
| rWG-Por1-b2-fw           | CTTTAAGAAGGAGATATACC-ATG-ATGATG-ACAACCGCCAATGGCATTAAAG              | 34-40                              | <i>POR1</i>  | -   |
| rWG-Por1-full-length-fw  | CTTTAAGAAGGAGATATACC-ATG-ATGATG-TCTCCTCCAGTTTACAGCGATATC            | 1-9                                | <i>POR1</i>  | -   |
| rWG-Por1-b1(C280)-rev    | TGATGATGAGAACCCCCCCC-TTA-CATCATCAT-AGCGTCTGAAGCACAAGAC              | 277-283                            | <i>POR1</i>  | 280 |
| rWG-Por1-b1(C278)-rev    | TGATGATGAGAACCCCCCCC-TTA-CATCATCAT-AGCGTCTGAAGGACAAACACCAAC         | 277-283                            | <i>POR1</i>  | 278 |
| rWG-Por1-b1(C277)-rev    | TGATGATGAGAACCCCCCCC-TTA-CATCATCAT-AGCGTCTGAAGGACAAAGAACAAAC        | 277-283                            | <i>POR1</i>  | 277 |
| rWG-Por1-F281Q-rev       | TGATGATGAGAACCCCCCCC-TCA-CATCATCAT-AGCGTCTGAAGAACAAAGACCAAC         | 277-283                            | <i>POR1</i>  | -   |
| rWG-Por1-L279A-rev       | TGATGATGAGAACCCCCCCC-TTA-CATCATCAT-AGCGTCTGAAGGACGCAGACCAACC        | 276-283                            | <i>POR1</i>  | -   |
| rWG-Por1-(C276)L279A-rev | TGATGATGAGAACCCCCCCC-TTA-CATCATCAT-AGCGTCTGAAGGACGCAGACCAACA        | 276-283                            | <i>POR1</i>  | 276 |
| rWG-Por1-(C280)L279A-rev | TGATGATGAGAACCCCCCCC-TTA-CATCATCAT-AGCGTCTGAAGCACGCAGACCAACC        | 277-283                            | <i>POR1</i>  | 280 |
| rWG-Tom40-rev            | TGATGATGAGAACCCCCCCC-TTA-CATCATCAT-CAATTGAGGAAGAGCTTGCAATGG         | 380-378                            | <i>TOM40</i> | -   |
| rWG-Tom40-b15-fw         | CTTTAAGAAGGAGATATACC-ATG-ATGATG-CAAGCTGGTATGGTTCCTATTACTG           | 284-276                            | <i>TOM40</i> | -   |

**Table S3. List of *S. cerevisiae* strains used in this study.**

pr, promoter.

| Strain name                             | Strain No. | Genotype                                                                                                                          | Parental strain | Method used       | Source     |
|-----------------------------------------|------------|-----------------------------------------------------------------------------------------------------------------------------------|-----------------|-------------------|------------|
| <i>sam50</i> Δ<br>(shuffling strain)    | 2636       | <i>MATa ura3-52 lys2-801_amber ade2-101_ochre trp1-Δ63 his3-Δ200 leu2-Δ1 sam50::ade2</i><br>[Yep352-MET25pr-Sam50-CYC1t]          | YPH499          | –                 | 7          |
| Wild-type (WT) for <i>sam50</i> mutants | 2630       | <i>MATa ura3-52 lys2-801_amber ade2-101_ochre trp1-Δ63 his3-Δ200 leu2-Δ1 sam50::ade2</i><br>[pFL39-Sam50]                         | <i>sam50</i> Δ  | Plasmid shuffling | 13         |
| Sam50 <sub>R366A</sub>                  | 3986       | <i>MATa ura3-52 lys2-801_amber ade2-101_ochre trp1-Δ63 his3-Δ200 leu2-Δ1 sam50::ade2</i><br>[pFL39-Sam50 <sub>R366A</sub> ]       | <i>sam50</i> Δ  | Plasmid shuffling | This study |
| Sam50 <sub>AAAA</sub>                   | 3987       | <i>MATa ura3-52 lys2-801_amber ade2-101_ochre trp1-Δ63 his3-Δ200 leu2-Δ1 sam50::ade2</i><br>[pFL39-Sam50 <sub>AAAA</sub> ]        | <i>sam50</i> Δ  | Plasmid shuffling | This study |
| Sam50 <sub>Cfree</sub>                  | 4867       | <i>MATa ura3-52 lys2-801_amber ade2-101_ochre trp1-Δ63 his3-Δ200 leu2-Δ1 sam50::ade2</i><br>[pFL39-Sam50 <sub>Cfree</sub> ]       | <i>sam50</i> Δ  | Plasmid shuffling | This study |
| Sam50ΔPOTRA <sub>Cfree</sub>            | 5056       | <i>MATa ura3-52 lys2-801_amber ade2-101_ochre trp1-Δ63 his3-Δ200 leu2-Δ1 sam50::ade2</i><br>[pFL39-Sam50ΔPOTRA <sub>Cfree</sub> ] | <i>sam50</i> Δ  | Plasmid shuffling | This study |
| Sam50ΔPOTRA <sub>C126</sub>             | 5057       | <i>MATa ura3-52 lys2-801_amber ade2-101_ochre trp1-Δ63 his3-Δ200 leu2-Δ1 sam50::ade2</i><br>[pFL39-Sam50ΔPOTRA <sub>C126</sub> ]  | <i>sam50</i> Δ  | Plasmid shuffling | This study |
| Sam50ΔPOTRA <sub>C479</sub>             | 5058       | <i>MATa ura3-52 lys2-801_amber ade2-101_ochre trp1-Δ63 his3-Δ200 leu2-Δ1 sam50::ade2</i><br>[pFL39-Sam50ΔPOTRA <sub>C479</sub> ]  | <i>sam50</i> Δ  | Plasmid shuffling | This study |
| Sam50ΔPOTRA <sub>C480</sub>             | 5059       | <i>MATa ura3-52 lys2-801_amber ade2-101_ochre trp1-Δ63 his3-Δ200 leu2-Δ1 sam50::ade2</i><br>[pFL39-Sam50ΔPOTRA <sub>C480</sub> ]  | <i>sam50</i> Δ  | Plasmid shuffling | This study |
| Sam50 <sub>C126</sub>                   | 4868       | <i>MATa ura3-52 lys2-801_amber ade2-101_ochre trp1-Δ63 his3-Δ200 leu2-Δ1 sam50::ade2</i><br>[pFL39-Sam50 <sub>C126</sub> ]        | <i>sam50</i> Δ  | Plasmid shuffling | This study |
| Sam50 <sub>C127</sub>                   | 4869       | <i>MATa ura3-52 lys2-801_amber ade2-101_ochre trp1-Δ63 his3-Δ200 leu2-Δ1 sam50::ade2</i><br>[pFL39-Sam50 <sub>C127</sub> ]        | <i>sam50</i> Δ  | Plasmid shuffling | This study |

|                       |      |                                                                                                                              |               |                   |            |
|-----------------------|------|------------------------------------------------------------------------------------------------------------------------------|---------------|-------------------|------------|
| Sam50 <sub>C128</sub> | 4870 | <i>MATa ura3-52 lys2-801_amber ade2-101_ochre trp1-Δ63 his3-Δ200 leu2-Δ1 sam50::ade2</i><br>[pFL39-Sam50Cf <sub>C128</sub> ] | <i>sam50Δ</i> | Plasmid shuffling | This study |
| Sam50 <sub>C129</sub> | 4871 | <i>MATa ura3-52 lys2-801_amber ade2-101_ochre trp1-Δ63 his3-Δ200 leu2-Δ1 sam50::ade2</i><br>[pFL39-Sam50Cf <sub>C129</sub> ] | <i>sam50Δ</i> | Plasmid shuffling | This study |
| Sam50 <sub>C130</sub> | 4872 | <i>MATa ura3-52 lys2-801_amber ade2-101_ochre trp1-Δ63 his3-Δ200 leu2-Δ1 sam50::ade2</i><br>[pFL39-Sam50Cf <sub>C130</sub> ] | <i>sam50Δ</i> | Plasmid shuffling | This study |
| Sam50 <sub>C369</sub> | 4908 | <i>MATa ura3-52 lys2-801_amber ade2-101_ochre trp1-Δ63 his3-Δ200 leu2-Δ1 sam50::ade2</i><br>[pFL39-Sam50Cf <sub>C369</sub> ] | <i>sam50Δ</i> | Plasmid shuffling | This study |
| Sam50 <sub>C371</sub> | 4909 | <i>MATa ura3-52 lys2-801_amber ade2-101_ochre trp1-Δ63 his3-Δ200 leu2-Δ1 sam50::ade2</i><br>[pFL39-Sam50Cf <sub>C371</sub> ] | <i>sam50Δ</i> | Plasmid shuffling | This study |
| Sam50 <sub>C454</sub> | 5074 | <i>MATa ura3-52 lys2-801_amber ade2-101_ochre trp1-Δ63 his3-Δ200 leu2-Δ1 sam50::ade2</i><br>[pFL39-Sam50Cf <sub>C454</sub> ] | <i>sam50Δ</i> | Plasmid shuffling | This study |
| Sam50 <sub>C455</sub> | 5070 | <i>MATa ura3-52 lys2-801_amber ade2-101_ochre trp1-Δ63 his3-Δ200 leu2-Δ1 sam50::ade2</i><br>[pFL39-Sam50Cf <sub>C455</sub> ] | <i>sam50Δ</i> | Plasmid shuffling | This study |
| Sam50 <sub>C456</sub> | 5071 | <i>MATa ura3-52 lys2-801_amber ade2-101_ochre trp1-Δ63 his3-Δ200 leu2-Δ1 sam50::ade2</i><br>[pFL39-Sam50Cf <sub>C456</sub> ] | <i>sam50Δ</i> | Plasmid shuffling | This study |
| Sam50 <sub>C457</sub> | 5072 | <i>MATa ura3-52 lys2-801_amber ade2-101_ochre trp1-Δ63 his3-Δ200 leu2-Δ1 sam50::ade2</i><br>[pFL39-Sam50Cf <sub>C457</sub> ] | <i>sam50Δ</i> | Plasmid shuffling | This study |
| Sam50 <sub>C458</sub> | 5073 | <i>MATa ura3-52 lys2-801_amber ade2-101_ochre trp1-Δ63 his3-Δ200 leu2-Δ1 sam50::ade2</i><br>[pFL39-Sam50Cf <sub>C458</sub> ] | <i>sam50Δ</i> | Plasmid shuffling | This study |
| Sam50 <sub>C478</sub> | 4873 | <i>MATa ura3-52 lys2-801_amber ade2-101_ochre trp1-Δ63 his3-Δ200 leu2-Δ1 sam50::ade2</i><br>[pFL39-Sam50Cf <sub>C478</sub> ] | <i>sam50Δ</i> | Plasmid shuffling | This study |
| Sam50 <sub>C479</sub> | 4874 | <i>MATa ura3-52 lys2-801_amber ade2-101_ochre trp1-Δ63 his3-Δ200 leu2-Δ1 sam50::ade2</i><br>[pFL39-Sam50Cf <sub>C479</sub> ] | <i>sam50Δ</i> | Plasmid shuffling | This study |
| Sam50 <sub>C480</sub> | 4875 | <i>MATa ura3-52 lys2-801_amber ade2-101_ochre trp1-Δ63 his3-Δ200 leu2-Δ1 sam50::ade2</i><br>[pFL39-Sam50Cf <sub>C480</sub> ] | <i>sam50Δ</i> | Plasmid shuffling | This study |

|                            |      |                                                                                                                                   |               |                   |            |
|----------------------------|------|-----------------------------------------------------------------------------------------------------------------------------------|---------------|-------------------|------------|
| Sam50 <sub>C481</sub>      | 4876 | <i>MATa ura3-52 lys2-801_amber ade2-101_ochre trp1-Δ63 his3-Δ200 leu2-Δ1 sam50::ade2</i><br>[pFL39-Sam50Cf <sub>C481</sub> ]      | <i>sam50Δ</i> | Plasmid shuffling | This study |
| Sam50 <sub>C482</sub>      | 4877 | <i>MATa ura3-52 lys2-801_amber ade2-101_ochre trp1-Δ63 his3-Δ200 leu2-Δ1 sam50::ade2</i><br>[pFL39-Sam50Cf <sub>C482</sub> ]      | <i>sam50Δ</i> | Plasmid shuffling | This study |
| Sam50 <sub>C484</sub>      | 4878 | <i>MATa ura3-52 lys2-801_amber ade2-101_ochre trp1-Δ63 his3-Δ200 leu2-Δ1 sam50::ade2</i><br>[pFL39-Sam50Cf <sub>C484</sub> ]      | <i>sam50Δ</i> | Plasmid shuffling | This study |
| Sam50 <sub>C478/C126</sub> | 5060 | <i>MATa ura3-52 lys2-801_amber ade2-101_ochre trp1-Δ63 his3-Δ200 leu2-Δ1 sam50::ade2</i><br>[pFL39-Sam50Cf <sub>C478/C126</sub> ] | <i>sam50Δ</i> | Plasmid shuffling | This study |
| Sam50 <sub>C478/C127</sub> | 5061 | <i>MATa ura3-52 lys2-801_amber ade2-101_ochre trp1-Δ63 his3-Δ200 leu2-Δ1 sam50::ade2</i><br>[pFL39-Sam50Cf <sub>C478/C127</sub> ] | <i>sam50Δ</i> | Plasmid shuffling | This study |
| Sam50 <sub>C478/C128</sub> | 5062 | <i>MATa ura3-52 lys2-801_amber ade2-101_ochre trp1-Δ63 his3-Δ200 leu2-Δ1 sam50::ade2</i><br>[pFL39-Sam50Cf <sub>C478/C128</sub> ] | <i>sam50Δ</i> | Plasmid shuffling | This study |
| Sam50 <sub>C478/C129</sub> | 5063 | <i>MATa ura3-52 lys2-801_amber ade2-101_ochre trp1-Δ63 his3-Δ200 leu2-Δ1 sam50::ade2</i><br>[pFL39-Sam50Cf <sub>C478/C129</sub> ] | <i>sam50Δ</i> | Plasmid shuffling | This study |
| Sam50 <sub>C478/C130</sub> | 5064 | <i>MATa ura3-52 lys2-801_amber ade2-101_ochre trp1-Δ63 his3-Δ200 leu2-Δ1 sam50::ade2</i><br>[pFL39-Sam50Cf <sub>C478/C130</sub> ] | <i>sam50Δ</i> | Plasmid shuffling | This study |
| Sam50 <sub>C480/C126</sub> | 4879 | <i>MATa ura3-52 lys2-801_amber ade2-101_ochre trp1-Δ63 his3-Δ200 leu2-Δ1 sam50::ade2</i><br>[pFL39-Sam50Cf <sub>C480/C126</sub> ] | <i>sam50Δ</i> | Plasmid shuffling | This study |
| Sam50 <sub>C480/C127</sub> | 4880 | <i>MATa ura3-52 lys2-801_amber ade2-101_ochre trp1-Δ63 his3-Δ200 leu2-Δ1 sam50::ade2</i><br>[pFL39-Sam50Cf <sub>C480/C127</sub> ] | <i>sam50Δ</i> | Plasmid shuffling | This study |
| Sam50 <sub>C480/C128</sub> | 4881 | <i>MATa ura3-52 lys2-801_amber ade2-101_ochre trp1-Δ63 his3-Δ200 leu2-Δ1 sam50::ade2</i><br>[pFL39-Sam50Cf <sub>C480/C128</sub> ] | <i>sam50Δ</i> | Plasmid shuffling | This study |
| Sam50 <sub>C480/C129</sub> | 4882 | <i>MATa ura3-52 lys2-801_amber ade2-101_ochre trp1-Δ63 his3-Δ200 leu2-Δ1 sam50::ade2</i><br>[pFL39-Sam50Cf <sub>C480/C129</sub> ] | <i>sam50Δ</i> | Plasmid shuffling | This study |
| Sam50 <sub>C480/C130</sub> | 4883 | <i>MATa ura3-52 lys2-801_amber ade2-101_ochre trp1-Δ63 his3-Δ200 leu2-Δ1 sam50::ade2</i><br>[pFL39-Sam50Cf <sub>C480/C130</sub> ] | <i>sam50Δ</i> | Plasmid shuffling | This study |

|                                |      |                                                                                                                                                                        |               |                                                           |            |
|--------------------------------|------|------------------------------------------------------------------------------------------------------------------------------------------------------------------------|---------------|-----------------------------------------------------------|------------|
| Sam50 <sub>C482/C126</sub>     | 5065 | <i>MATa ura3-52 lys2-801_amber ade2-101_ochre trp1-Δ63 his3-Δ200 leu2-Δ1 sam50::ade2 [pFL39-Sam50Cf<sub>C482/C126</sub>]</i>                                           | <i>sam50Δ</i> | Plasmid shuffling                                         | This study |
| Sam50 <sub>C482/C127</sub>     | 5066 | <i>MATa ura3-52 lys2-801_amber ade2-101_ochre trp1-Δ63 his3-Δ200 leu2-Δ1 sam50::ade2 [pFL39-Sam50Cf<sub>C482/C127</sub>]</i>                                           | <i>sam50Δ</i> | Plasmid shuffling                                         | This study |
| Sam50 <sub>C482/C128</sub>     | 5067 | <i>MATa ura3-52 lys2-801_amber ade2-101_ochre trp1-Δ63 his3-Δ200 leu2-Δ1 sam50::ade2 [pFL39-Sam50Cf<sub>C482/C128</sub>]</i>                                           | <i>sam50Δ</i> | Plasmid shuffling                                         | This study |
| Sam50 <sub>C482/C129</sub>     | 5068 | <i>MATa ura3-52 lys2-801_amber ade2-101_ochre trp1-Δ63 his3-Δ200 leu2-Δ1 sam50::ade2 [pFL39-Sam50Cf<sub>C482/C129</sub>]</i>                                           | <i>sam50Δ</i> | Plasmid shuffling                                         | This study |
| Sam50 <sub>C482/C130</sub>     | 5069 | <i>MATa ura3-52 lys2-801_amber ade2-101_ochre trp1-Δ63 his3-Δ200 leu2-Δ1 sam50::ade2 [pFL39-Sam50Cf<sub>C482/C130</sub>]</i>                                           | <i>sam50Δ</i> | Plasmid shuffling                                         | This study |
| YPH499 (WT, Fig. 6, S6, S7)    | 1501 | <i>MATa ura3-52 lys2-801_amber ade2-101_ochre trp1-Δ63 his3-Δ200 leu2-Δ1</i>                                                                                           | –             | –                                                         | 67         |
| Gal1Sam50                      | 2396 | <i>MATa ura3-52 lys2-801_amber ade2-101_ochre trp1-Δ63 his3-Δ200 leu2 SAM50<sub>pr</sub>::SAM50<sub>pr</sub>-HIS3-Gal1<sub>pr</sub></i>                                | YPH499        | Homologous recombination (Template 1439, Primers R2 + F4) | 13         |
| Sam50↓                         | 3988 | <i>MATa ura3-52 lys2-801_amber ade2-101_ochre trp1-Δ63 his3-Δ200 leu2 SAM50<sub>pr</sub>::SAM50<sub>pr</sub>-HIS3-Gal1<sub>pr</sub> [pFL39]</i>                        | Gal1Sam50     | Growth on selective medium                                | This study |
| Sam50↓+WT                      | 3989 | <i>MATa ura3-52 lys2-801_amber ade2-101_ochre trp1-Δ63 his3-Δ200 leu2 SAM50<sub>pr</sub>::SAM50<sub>pr</sub>-HIS3-Gal1<sub>pr</sub> [pFL39-Sam50]</i>                  | Gal1Sam50     | Growth on selective medium                                | This study |
| Sam50↓+Sam50 <sub>Δloop6</sub> | 3990 | <i>MATa ura3-52 lys2-801_amber ade2-101_ochre trp1-Δ63 his3-Δ200 leu2 SAM50<sub>pr</sub>::SAM50<sub>pr</sub>-HIS3-Gal1<sub>pr</sub> [pFL39-Sam50<sub>Δloop6</sub>]</i> | Gal1Sam50     | Growth on selective medium                                | This study |

**Table S4. List of antibodies used in this study.**

| <b>Antigen</b> | <b>Dilution</b>       | <b>Number</b> |
|----------------|-----------------------|---------------|
| Cox4           | 1:500 TBS + 5% milk   | GR578-5       |
| Cyc1           | 1:1000 TBS + 5% milk  | GR541-6       |
| Dic1           | 1:200 TBS + 5% milk   | GR2055-2      |
| Mdm10          | 1:250 TBS + 5% milk   | GR1145-3      |
| Om45           | 1:100 TBS-T + 5% milk | GR1391-4      |
| Por1           | 1:1000 TBS + 5% milk  | 94D           |
| Sam50          | 1:250 TBS + 5% milk   | 312-6         |
| Sam37          | 1:500 TBS-T + 5% milk | 161-6         |
| Sam35          | 1:250 TBS + 5% milk   | GR551-7       |
| Tim44          | 1:1000 TBS 5% milk    | 127-2         |
| Tim23          | 1:500 TBS + 5% milk   | 133-9         |
| Tim22          | 1:500 TBS + 5% milk   | 164-6         |
| Tim10          | 1:500 TBS-T + 5% milk | 217-3         |
| Tom70          | 1:250 TBS + 5% milk   | GR657-5       |
| Tom40          | 1:500 TBS-T + 5% milk | 168-4         |
| Tom22          | 1:5000 TBS + 5% milk  | GR3227-2      |
| Tom20          | 1:5000 TBS + 5% milk  | GR3225-7      |
| Tom7           | 1:250 TBS + 5% milk   | 230-13        |
| Tom5           | 1:500 TBS + 5% milk   | GR3420-7      |

**Model S1. Model of Sam50  $\beta$ -barrel domain (PDB format).**



## References

1. S. A. Paschen, T. Waizenegger, T. Stan, M. Preuss, M. Cyrklaff, K. Hell, D. Rapaport, W. Neupert, Evolutionary conservation of biogenesis of  $\beta$ -barrel membrane proteins. *Nature* **426**, 862–866 (2003).
2. R. Voulhoux, M. P. Bos, J. Geurtsen, M. Mols, J. Tommassen, Role of a highly conserved bacterial protein in outer membrane protein assembly. *Science* **299**, 262–265 (2003).
3. N. Wiedemann, V. Kozjak, A. Chacinska, B. Schönfisch, S. Rospert, M. T. Ryan, N. Pfanner, C. Meisinger, Machinery for protein sorting and assembly in the mitochondrial outer membrane. *Nature* **424**, 565–571 (2003).
4. T. Wu, J. Malinverni, N. Ruiz, S. Kim, T. J. Silhavy, D. Kahne, Identification of a multicomponent complex required for outer membrane biogenesis in *Escherichia coli*. *Cell* **121**, 235–245 (2005).
5. C. L. Hagan, T. J. Silhavy, D. Kahne,  $\beta$ -Barrel membrane protein assembly by the Bam complex. *Annu. Rev. Biochem.* **80**, 189–210 (2011).
6. T. Jores, A. Klinger, L. E. Groß, S. Kawano, N. Flinner, E. Duchardt-Ferner, J. Wöhnert, H. Kalbacher, T. Endo, E. Schleiff, D. Rapaport, Characterization of the targeting signal in mitochondrial  $\beta$ -barrel proteins. *Nat. Commun.* **7**, 12036 (2016).
7. V. Kozjak, N. Wiedemann, D. Milenkovic, C. Lohaus, H. E. Meyer, B. Guiard, C. Meisinger, N. Pfanner, An essential role of Sam50 in the protein sorting and assembly machinery of the mitochondrial outer membrane. *J. Biol. Chem.* **278**, 48520–48523 (2003).
8. I. Gentle, K. Gabriel, P. Beech, R. Waller, T. Lithgow, The Omp85 family of proteins is essential for outer membrane biogenesis in mitochondria and bacteria. *J. Cell Biol.* **164**, 19–24 (2004).
9. D. Ishikawa, H. Yamamoto, Y. Tamura, K. Moritoh, T. Endo, Two novel proteins in the mitochondrial outer membrane mediate  $\beta$ -barrel protein assembly. *J. Cell Biol.* **166**, 621–627 (2004).
10. D. Milenkovic, V. Kozjak, N. Wiedemann, C. Lohaus, H. E. Meyer, B. Guiard, N. Pfanner, C. Meisinger, Sam35 of the mitochondrial protein sorting and assembly machinery is a peripheral outer membrane protein essential for cell viability. *J. Biol. Chem.* **279**, 22781–22785 (2004).
11. T. Waizenegger, S. J. Habib, M. Lech, D. Mokranjac, S. A. Paschen, K. Hell, W. Neupert, D. Rapaport, Tob38, a novel essential component in the biogenesis of  $\beta$ -barrel proteins of mitochondria. *EMBO Rep.* **5**, 704–709 (2004).
12. V. Robert, E. B. Volokhina, F. Senf, M. P. Bos, P. Van Gelder, J. Tommassen, Assembly factor Omp85 recognizes its outer membrane protein substrates by a species-specific C-terminal motif. *PLoS Biol.* **4**, e377 (2006).
13. S. Kutik, D. Stojanovski, L. Becker, T. Becker, M. Meinecke, V. Krüger, C. Prinz, C. Meisinger, B. Guiard, R. Wagner, N. Pfanner, N. Wiedemann, Dissecting membrane insertion of mitochondrial  $\beta$ -barrel proteins. *Cell* **132**, 1011–1024 (2008).
14. C. Stubenrauch, M. J. Belousoff, I. D. Hay, H.-H. Shen, J. Lillington, K. L. Tuck, K. M. Peters, M.-D. Phan, A. W. Lo, M. A. Schembri, R. A. Strugnell, G. Waksman, T. Lithgow, Effective assembly of fimbriae in *Escherichia coli* depends on the translocation assembly module nanomachine. *Nat. Microbiol.* **1**, 16064 (2016).
15. J. Lee, M. Xue, J. S. Wzorek, T. Wu, M. Grabowicz, L. S. Gronenberg, H. A. Sutterlin, R. M. Davis, N. Ruiz, T. J. Silhavy, D. E. Kahne, Characterization of a stalled complex on the  $\beta$ -barrel assembly machine. *Proc. Natl. Acad. Sci. U.S.A.* **113**, 8717–8722 (2016).

16. N. Noinaj, A. J. Kuszak, J. C. Gumbart, P. Lukacik, H. Chang, N. C. Easley, T. Lithgow, S. K. Buchanan, Structural insight into the biogenesis of  $\beta$ -barrel membrane proteins. *Nature* **501**, 385–390 (2013).
17. B. Clantin, A.-S. Delattre, P. Rucktooa, N. Saint, A. C. Méli, C. Loch, F. Jacob-Dubuisson, V. Villeret, Structure of the membrane protein FhaC: a member of the Omp85-TpsB transporter superfamily. *Science* **317**, 957–961 (2007).
18. F. Gruss, F. Zähringer, R. P. Jakob, B. M. Burmann, S. Hiller, T. Maier, The structural basis of autotransporter translocation by TamA. *Nat. Struct. Mol. Biol.* **20**, 1318–1320 (2013).
19. J. Selkrig, K. Mosbahi, C. T. Webb, M. J. Belousoff, A. J. Perry, T. J. Wells, F. Morris, D. L. Leyton, M. Totsika, M.-D. Phan, N. Celik, M. Kelly, C. Oates, E. L. Hartland, R. M. Robins-Browne, S. H. Ramarathinam, A. W. Purcell, M. A. Schembri, R. A. Strugnell, I. R. Henderson, D. Walker, T. Lithgow, Discovery of an archetypal protein transport system in bacterial outer membranes. *Nat. Struct. Mol. Biol.* **19**, 506–510 (2012).
20. C. Baud, J. Guérin, E. Petit, E. Lesne, E. Dupré, C. Loch, F. Jacob-Dubuisson, Translocation path of a substrate protein through its Omp85 transporter. *Nat. Commun.* **5**, 5271 (2014).
21. R. Albrecht, M. Schütz, P. Oberhettinger, M. Faulstich, I. Bermejo, T. Rudel, K. Diederichs, K. Zeth, Structure of BamA, an essential factor in outer membrane protein biogenesis. *Acta Crystallogr. D Biol. Crystallogr.* **70**, 1779–1789 (2014).
22. D. Ni, Y. Wang, X. Yang, H. Zhou, X. Hou, B. Cao, Z. Lu, X. Zhao, K. Yang, Y. Huang, Structural and functional analysis of the  $\beta$ -barrel domain of BamA from Escherichia coli. *FASEB J.* **28**, 2677–2685 (2014).
23. J. Bakelar, S. K. Buchanan, N. Noinaj, The structure of the  $\beta$ -barrel assembly machinery complex. *Science* **351**, 180–186 (2016).
24. Y. Gu, H. Li, H. Dong, Y. Zeng, Z. Zhang, N. G. Paterson, P. J. Stansfeld, Z. Wang, Y. Zhang, W. Wang, C. Dong, Structural basis of outer membrane protein insertion by the BAM complex. *Nature* **531**, 64–69 (2016).
25. L. Han, J. Zheng, Y. Wang, X. Yang, Y. Liu, C. Sun, B. Cao, H. Zhou, D. Ni, J. Lou, Y. Zhao, Y. Huang, Structure of the BAM complex and its implications for biogenesis of outer-membrane proteins. *Nat. Struct. Mol. Biol.* **23**, 192–196 (2016).
26. M. G. Iadanza, A. J. Higgins, B. Schiffrin, A. N. Calabrese, D. J. Brockwell, A. E. Ashcroft, S. E. Radford, N. A. Ranson, Lateral opening in the intact  $\beta$ -barrel assembly machinery captured by cryo-EM. *Nat. Commun.* **7**, 12865 (2016).
27. P. A. Doerner, M. S. Sousa, Extreme dynamics in the BamA  $\beta$ -barrel seam. *Biochemistry* **56**, 3142–3149 (2017).
28. A. Klein, L. Israel, S. W. K. Lackey, F. E. Nargang, A. Imhof, W. Baumeister, W. Neupert, D. R. Thomas, Characterization of the insertase for  $\beta$ -barrel proteins of the outer mitochondrial membrane. *J. Cell Biol.* **199**, 599–611 (2012).
29. B. van den Berg, Lateral gates:  $\beta$ -barrels get in on the act. *Nat. Struct. Mol. Biol.* **20**, 1237–1239 (2013).
30. D. Gessmann, Y. H. Chung, E. J. Danoff, A. M. Plummer, C. W. Sandlin, N. R. Zaccari, K. G. Fleming, Outer membrane  $\beta$ -barrel protein folding is physically controlled by periplasmic lipid head groups and BamA. *Proc. Natl. Acad. Sci. U.S.A.* **111**, 5878–5883 (2014).
31. N. Noinaj, A. J. Kuszak, C. Balusek, J. C. Gumbart, S. K. Buchanan, Lateral opening and exit pore formation are required for BamA function. *Structure* **22**, 1055–1062 (2014).
32. J. H. Kleinschmidt, Folding of  $\beta$ -barrel membrane proteins in lipid bilayers — Unassisted and assisted folding and insertion. *Biochim. Biophys. Acta* **1848**, 1927–1943 (2015).

33. N. Noinaj, S. E. Rollauer, S. K. Buchanan, The  $\beta$ -barrel membrane protein insertase machinery from Gram-negative bacteria. *Curr. Opin. Struct. Biol.* **31**, 35–42 (2015).
34. X. C. Zhang, L. Han, How does a  $\beta$ -barrel integral membrane protein insert into the membrane? *Protein Cell* **7**, 471–477 (2016).
35. N. Noinaj, J. C. Gumbart, S. K. Buchanan, The  $\beta$ -barrel assembly machinery in motion. *Nat. Rev. Microbiol.* **15**, 197–204 (2017).
36. R. S. Bamert, K. Lundquist, H. Hwang, C. T. Webb, T. Shiota, C. J. Stubenrauch, M. J. Belousoff, R. J. A. Goode, R. B. Schittenhelm, R. Zimmerman, M. Jung, J. C. Gumbart, T. Lithgow, Structural basis for substrate selection by the translocation and assembly module of the  $\beta$ -barrel assembly machinery. *Mol. Microbiol.* **106**, 142–156 (2017).
37. L. Estrada Mallarino, E. Fan, M. Odermatt, M. Müller, M. Lin, J. Liang, M. Heinzemann, F. Fritsche, H.-J. Apell, W. Welte, TtOmp85 a  $\beta$ -barrel assembly protein, functions by barrel augmentation. *Biochemistry* **54**, 844–852 (2015).
38. Y. Gu, Y. Zeng, Z. Wang, C. Dong, BamA  $\beta$ 16C strand and periplasmic turns are critical for outer membrane protein insertion and assembly. *Biochem. J.* **474**, 3951–3961 (2017).
39. J. Qiu, L.-S. Wenz, R. M. Zerbes, S. Oeljeklaus, M. Bohnert, D. A. Stroud, C. Wirth, L. Ellenrieder, N. Thornton, S. Kutik, S. Wiese, A. Schulze-Specking, N. Zufall, A. Chacinska, B. Guiard, C. Hunte, B. Warscheid, M. van der Laan, N. Pfanner, N. Wiedemann, T. Becker, Coupling of mitochondrial import and export translocases by receptor-mediated supercomplex formation. *Cell* **154**, 596–608 (2013).
40. T. Shiota, K. Imai, J. Qiu, V. L. Hewitt, K. Tan, H.-H. Shen, N. Sakiyama, Y. Fukasawa, S. Hayat, M. Kamiya, A. Elofsson, K. Tomii, P. Horton, N. Wiedemann, N. Pfanner, T. Lithgow, T. Endo, Molecular architecture of the active mitochondrial protein gate. *Science* **349**, 1544–1548 (2015).
41. L.-S. Wenz, L. Ellenrieder, J. Qiu, M. Bohnert, N. Zufall, M. van der Laan, N. Pfanner, N. Wiedemann, T. Becker, Sam37 is crucial for formation of the mitochondrial TOM–SAM supercomplex, thereby promoting  $\beta$ -barrel biogenesis. *J. Cell Biol.* **210**, 1047–1054 (2015).
42. S. Hiller, R. G. Garces, T. J. Malia, V. Y. Orekhov, M. Colombini, G. Wagner, Solution structure of the integral human membrane protein VDAC-1 in detergent micelles. *Science* **321**, 1206–1210 (2008).
43. M. Bayrhuber, T. Meins, M. Habeck, S. Becker, K. Giller, S. Villinger, C. Vonrhein, C. Griesinger, M. Zweckstetter, K. Zeth, Structure of the human voltage-dependent anion channel. *Proc. Natl. Acad. Sci. U.S.A.* **105**, 15370–15375 (2008).
44. R. Ujwal, D. Cascio, J.-P. Colletier, S. Faham, J. Zhang, L. Toro, P. Ping, J. Abramson, The crystal structure of mouse VDAC1 at 2.3 Å resolution reveals mechanistic insights into metabolite gating. *Proc. Natl. Acad. Sci. U.S.A.* **105**, 17742–17747 (2008).
45. D. A. Stroud, T. Becker, J. Qiu, D. Stojanovski, S. Pfannschmidt, C. Wirth, C. Hunte, B. Guiard, C. Meisinger, N. Pfanner, N. Wiedemann, Biogenesis of mitochondrial  $\beta$ -barrel proteins: the POTRA domain is involved in precursor release from the SAM complex. *Mol. Biol. Cell.* **22**, 2823–2833 (2011).
46. S. Kim, J. C. Malinverni, P. Sliz, T. J. Silhavy, S. C. Harrison, D. Khane, Structure and function of an essential component of the outer membrane protein assembly machine. *Science* **317**, 961–964 (2007).
47. P. Z. Gatzeva-Topalova, T. A. Walton, M. C. Sousa, Crystal structure of YaeT: conformational flexibility and substrate recognition. *Structure* **16**, 1873–1881 (2008).

48. T. J. Knowles, M. Jeeves, S. Bobat, F. Dancea, D. McClelland, T. Palmer, M. Overduin, I. R. Henderson, Fold and function of polypeptide transport-associated domains responsible for delivering unfolded proteins to membranes. *Mol. Microbiol.* **68**, 1216–1227 (2008).
49. M. P. Bos, V. Robert, J. Tommassen, Functioning of outer membrane protein assembly factor Omp85 requires a single POTRA domain. *EMBO Rep.* **12**, 1149–1154 (2007).
50. S. J. Habib, T. Waizenegger, A. Niewianda, S. A. Paschen, W. Neupert, D. Rapaport, The N-terminal domain of Tob55 has a receptor-like function in the biogenesis of mitochondrial  $\beta$ -barrel proteins. *J. Cell Biol.* **176**, 77–88 (2007).
51. A.-K. Pfitzner, N. Steblau, T. Ulrich, P. Oberhettinger, I. B. Autenrieth, M. Schütz, D. Rapaport, Mitochondrial-bacterial hybrids of BamA/Tob55 suggest variable requirements for the membrane integration of  $\beta$ -barrel proteins. *Sci. Rep.* **6**, 39053 (2016).
52. T. Maier, B. Clantin, F. Gruss, F. Dewitte, A.-S. Delattre, F. Jacob-Dubuisson, S. Hiller, V. Villeret, Conserved Omp85 lid-lock structure and substrate recognition in FhaC. *Nat. Commun.* **6**, 7452 (2015).
53. A.-S. Delattre, B. Clantin, N. Saint, C. Locht, V. Villeret, F. Jacob-Dubuisson, Functional importance of a conserved sequence motif in FhaC, a prototypic member of the TpsB/Omp85 superfamily. *FEBS J.* **277**, 4755–4765 (2010).
54. M. Leonard-Rivera, R. Misra, Conserved residues of the putative L6 loop of Escherichia coli BamA play a critical role in the assembly of  $\beta$ -barrel outer membrane proteins, including that of BamA itself. *J. Bacteriol.* **194**, 4662–4668 (2012).
55. A. I. C. Höhr, S. P. Straub, B. Warscheid, T. Becker, N. Wiedemann, Assembly of  $\beta$ -barrel proteins in the mitochondrial outer membrane. *Biochim. Biophys. Acta.* **1853**, 74–88 (2015).
56. N. W. Rigel, D. P. Ricci, T. J. Silhavy, Conformation-specific labeling of BamA and suppressor analysis suggest a cyclic mechanism for  $\beta$ -barrel assembly in Escherichia coli. *Proc. Natl. Acad. Sci. U.S.A.* **110**, 5151–5156 (2013).
57. N. Wiedemann, K. N. Truscott, S. Pfannschmidt, B. Guiard, C. Meisinger, N. Pfanner, Biogenesis of the protein import channel Tom40 of the mitochondrial outer membrane: intermembrane space components are involved in an early stage of the assembly pathway. *J. Biol. Chem.* **279**, 18188–18194 (2004).
58. S. C. Hoppins, F. E. Nargang, The Tim8-Tim13 complex of *Neurospora crassa* functions in the assembly of proteins into both mitochondrial membranes. *J. Biol. Chem.* **279**, 12396–12405 (2004).
59. J. G. Sklar, T. Wu, D. Khane, T. J. Silhavy, Defining the roles of the periplasmic chaperones SurA, Skp, and DegP in Escherichia coli. *Genes Dev.* **21**, 2473–2484 (2007).
60. J. W. Fairman, N. Noinaj, S. K. Buchanan, The structural biology of  $\beta$ -barrel membrane proteins: a summary of recent reports. *Curr. Opin. Struct. Biol.* **21**, 523–531 (2011).
61. T. Ulrich, D. Rapaport, Biogenesis of beta-barrel proteins in evolutionary context. *Int. J. Med. Microbiol.* **305**, 259–264 (2015).
62. G. J. Patel, J. H. Kleinschmidt, The lipid bilayer-inserted membrane protein BamA of Escherichia coli facilitates insertion and folding of outer membrane Protein A from its complex with Skp. *Biochemistry* **52**, 3974–3986 (2013).
63. E. J. Danoff, K. G. Fleming, Membrane defects accelerate outer membrane  $\beta$ -barrel protein folding. *Biochemistry* **54**, 97–99 (2015).
64. B. Schiffrin, A. N. Calabrese, A. J. Higgins, J. R. Humes, A. E. Ashcroft, A. C. Kalli, D. J. Brockwell, S. E. Radford, Effects of periplasmic chaperones and membrane thickness on BamA-catalysed outer membrane protein folding. *J. Mol. Biol.* **23**, 3776–3792 (2017).

65. R. Sikdar, J. H. Peterson, D. E. Anderson, H. D. Bernstein, Folding of a bacterial integral outer membrane protein is initiated in the periplasm. *Nat. Commun.* **8**, 1309 (2017).
66. N. Bonneaud, O. Ozier-Kalogeropoulos, G. Y. Li, M. Labouesse, L. Minvielle-Sebastia, F. Lacroute, A family of low and high copy replicative, integrative and single-stranded *S. cerevisiae*/*E. coli* shuttle vectors. *Yeast* **7**, 609–615 (1991).
67. R. S. Sikorski, P. Hieter, A system of shuttle vectors and yeast host strains designed for efficient manipulation of DNA in *Saccharomyces cerevisiae*. *Genetics* **122**, 19–27 (1989).
68. M. S. Longtine, A. McKenzie III, D. J. Demarini, N. G. Shah, A. Wach, A. Brachat, P. Philippsen, J. R. Pringle, Additional modules for versatile and economical PCR-based gene deletion and modification in *Saccharomyces cerevisiae*. *Yeast* **14**, 953–961 (1998).
69. M. M. Bradford, A rapid and sensitive method for the quantitation of microgram quantities of protein utilizing the principle of protein-dye binding. *Anal. Biochem.* **72**, 248–254 (1976).
70. C. Meisinger, N. Pfanner, K. N. Truscott, Isolation of yeast mitochondria. *Methods. Mol. Biol.* **313**, 33–39 (2006).
71. A. Hildebrand, M. Remmert, A. Biegert, J. Söding, Fast and accurate automatic structure prediction with HHpred. *Proteins* **77**, 128–132 (2009).
72. B. Webb, A. Sali, Comparative protein structure modeling using MODELLER. *Curr. Protoc. Bioinformatics* **47**, 1–32 (2014).
73. S.C. Lovell, I.W. Davis, W.B. Arendall III, P.I.W. de Bakker, J.M. Word, M.G. Prisant, J.S. Richardson, D.C. Richardson, Structure validation by C $\alpha$  geometry:  $\phi$ ,  $\psi$  and C $\beta$  deviation. *Proteins* **50**, 437–450 (2003).
74. P. Emsley, B. Lohkamp, W. G. Scott, K. Cowtan, Features and development of Coot. *Acta Crystallogr. D Biol. Crystallogr.* **66**, 486–501 (2010).
75. D. Stojanovski, N. Pfanner, N. Wiedemann, Import of proteins into mitochondria. *Methods Cell Biol.* **80**, 783–806 (2007).
76. H. Schägger, G. von Jagow, Blue native electrophoresis for isolation of membrane protein complexes in enzymatically active form. *Anal. Biochem.* **199**, 223–231 (1991).
77. W. N. Burnette, “Western blotting”: electrophoretic transfer of proteins from sodium dodecyl sulfate-polyacrylamide gels to unmodified nitrocellulose and radiographic detection with antibody and radioiodinated protein A. *Anal. Biochem.* **112**, 195–203 (1981).
78. R. J. L. Willems, C. Geuijen, H. G. J. van der Heide, G. Renauld, P. Bertin, W. M. R. van den Akker, C. Locht, F. R. Mooi, Mutational analysis of the *Bordetella pertussis* fim/fha gene cluster: identification of a gene with sequence similarities to haemolysin accessory genes involved in export of FHA. *Mol. Microbiol.* **11**, 337–347 (1994).
